# Supplementary material for: An enantioselective assembly of naphthopyran via NHC-catalyzed [3 + 3] annulation of bromoenal with β-tetralone
Source: Royal Society of Chemistry journal article supplement (doi:10.1039/c8ob02192a), 2018-12-05
Supplement: c8ob02192a1.pdf [file c8ob02192a1.pdf]

## Supporting Information

### **An Enantioselective Assembly of Naphthopyran via NHC-Catalyzed**

### **[3+3] Annulation of Bromoenal with $\beta$ -Tetralone**

Sha Li<sup>‡</sup>, Yibiao Yao<sup>‡</sup>, Ziwei Tang, Baomin Sun, Chenxia Yu, Tuanjie Li\* and Changsheng Yao\*

*School of Chemistry and Materials Science, Jiangsu Key Lab of Green Synthetic Chemistry for Functional Materials, Jiangsu Normal University, Xuzhou, Jiangsu 221116, P R China.*

E-mail: [csyao@jsnu.edu.cn](mailto:csyao@jsnu.edu.cn).

†Electronic Supplementary Information (ESI) available: <sup>1</sup>H and <sup>13</sup>C NMR spectra. See DOI: 10.1039/x0xx00000x

‡These authors contributed equally to the work.

#### **Content**

|                                                                            |    |
|----------------------------------------------------------------------------|----|
| General methods .....                                                      | 2  |
| Experimental section.....                                                  | 2  |
| Copies of <sup>1</sup> H and <sup>13</sup> C NMR spectra of products ..... | 4  |
| Copies of HPLC Spectra of products.....                                    | 21 |

## General methods

Common reagents and materials were purchased from commercial sources and purified by recrystallization or distillation. Melting points were determined in open capillaries and were uncorrected. IR spectra were taken on a FT-IR-Tensor 27 spectrometer in KBr pellets and reported in  $\text{cm}^{-1}$ .  $^1\text{H}$  NMR spectra were measured on a Bruker DPX 400 MHz spectrometer in  $\text{CDCl}_3$  with chemical shift ( $\delta$ ) given in ppm relative to TMS as internal standard. High resolution mass spectra (HRMS) were obtained on a micrOTOF-Q II HRMS/MS instrument (Bruker) with the technique of electrospray ionization. Optical rotation values were measured with instruments operating at  $\lambda = 589$  nm, corresponding to the sodium D line at the temperatures indicated.

## Experimental section

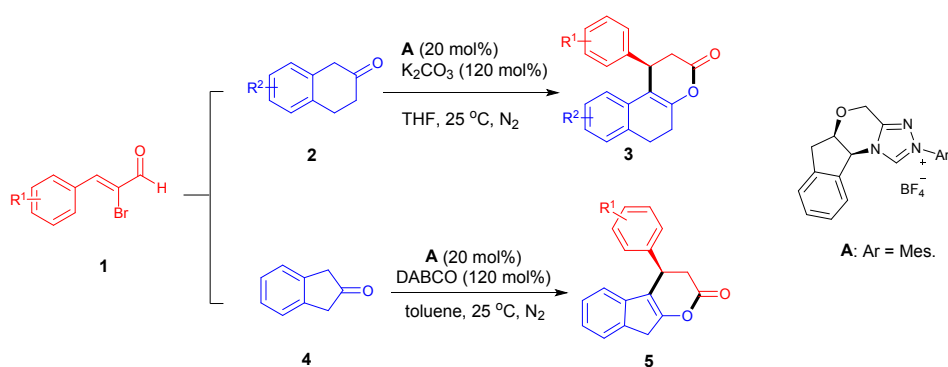

An oven-dried 10 mL Schlenk tube equipped with a magnetic stir bar was charged with triazolium salt **A** (16.8 mg, 0.04 mmol),  $\text{K}_2\text{CO}_3$  (33.1 mg, 0.24 mmol) or DABCO (26.9 mg, 0.24 mmol), bromoaldehyde **1** (0.30 mmol) and  $\beta$ -tetralone **2** (0.2 mmol) or  $\beta$ -indanone **4** (0.2 mmol). Freshly distilled THF (3 mL) or toluene (3 mL) was added into the mixture with a syringe. Then tube was closed with a septum, evacuated, and refilled with nitrogen. The mixture was stirred at 25 °C until completion (monitored by TLC). After removal of the solvent under reduced pressure, the resulted crude residue was

purified by column chromatography (silicagel, mixtures of petroleum ether/ethyl acetate, 9:1-19:1, v/v) to afford the desired product **3** or **5**.

# Copies of $^1\text{H}$ and $^{13}\text{C}$ NMR spectra of products

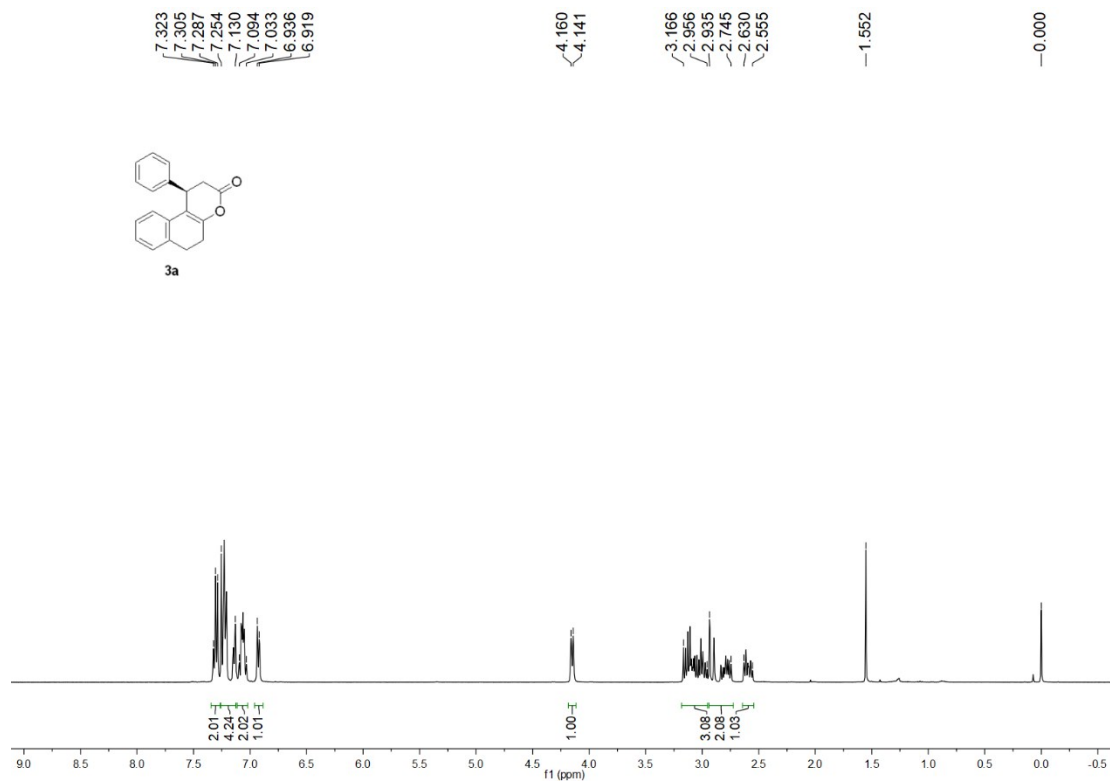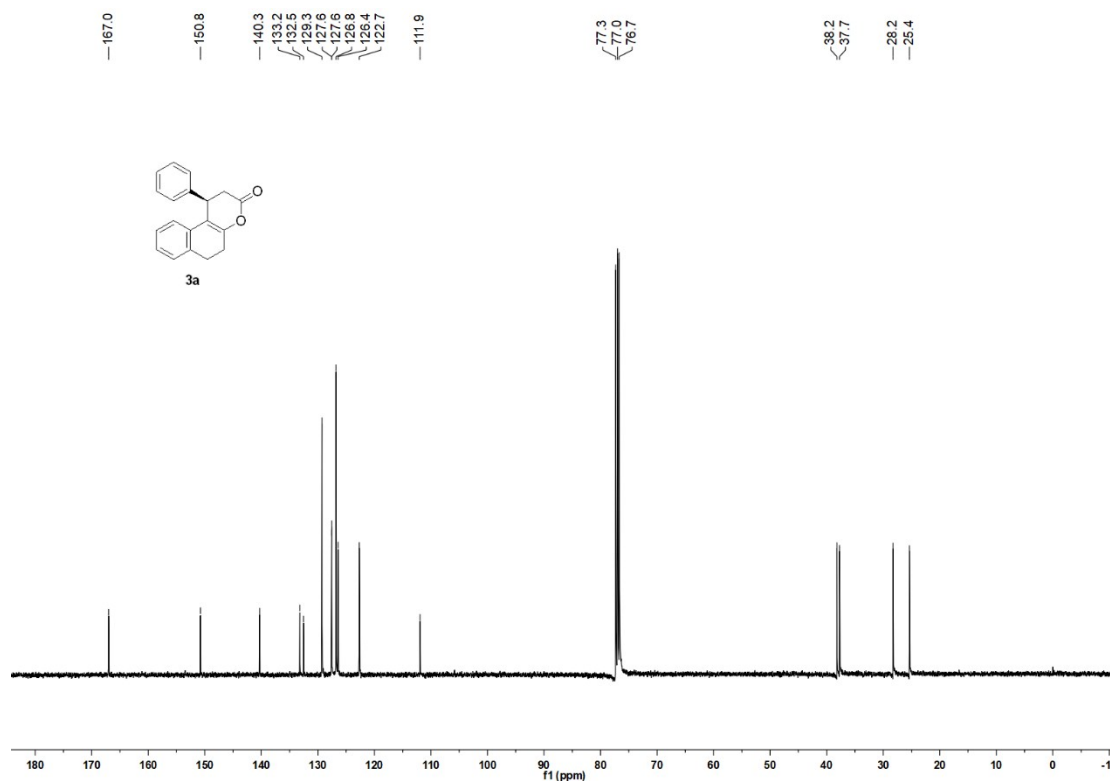

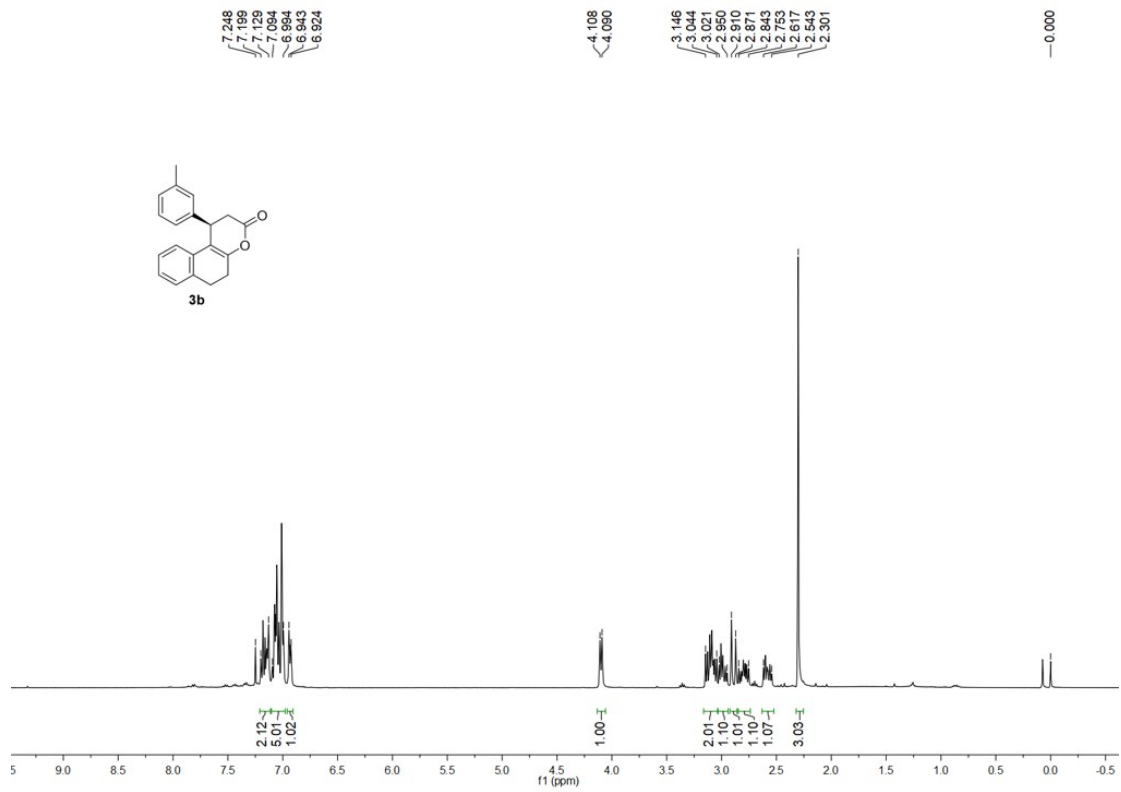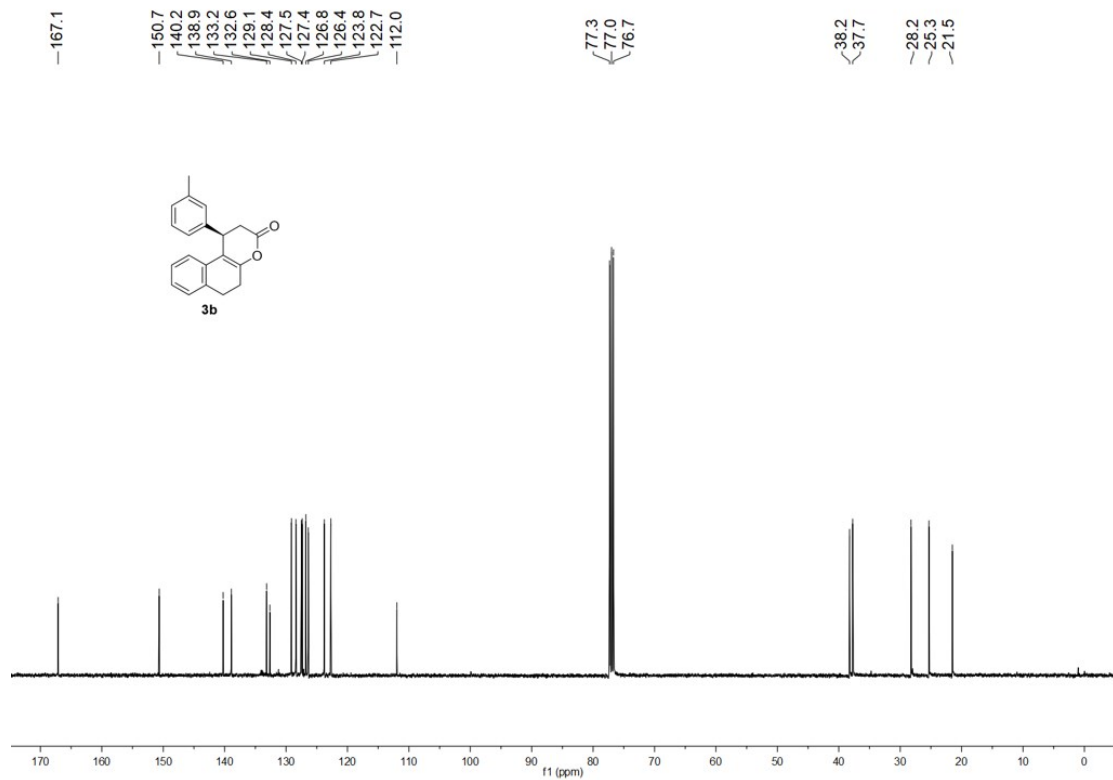

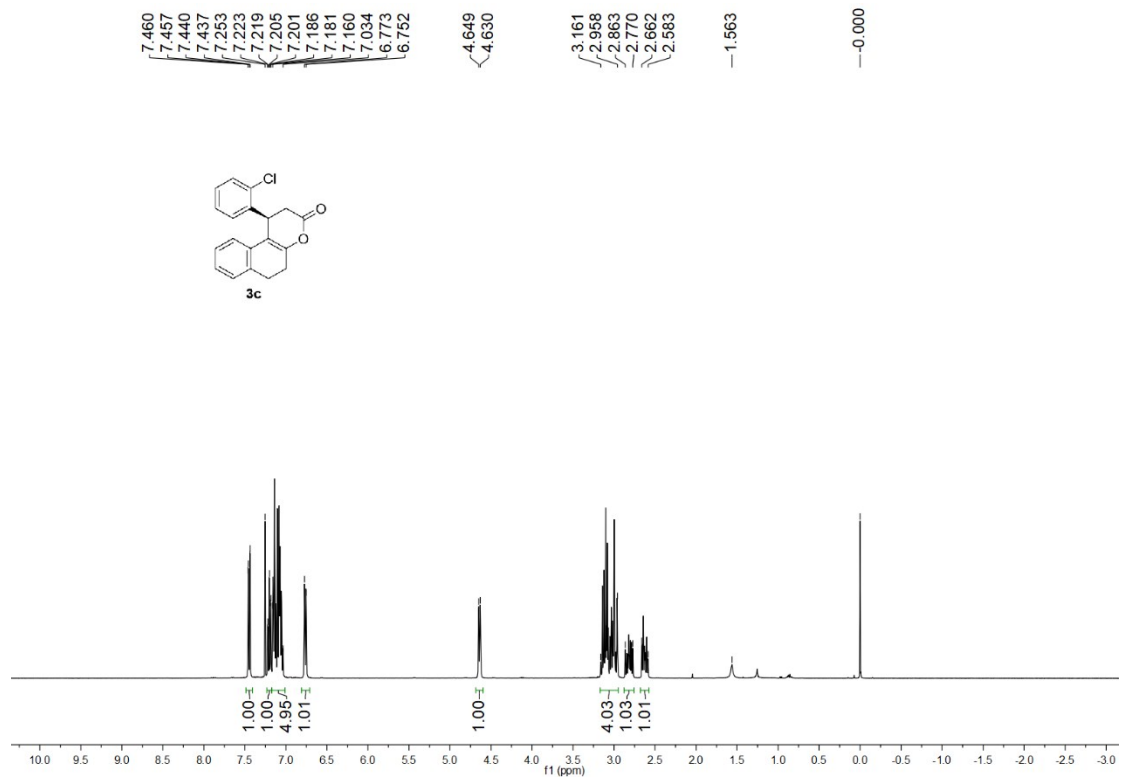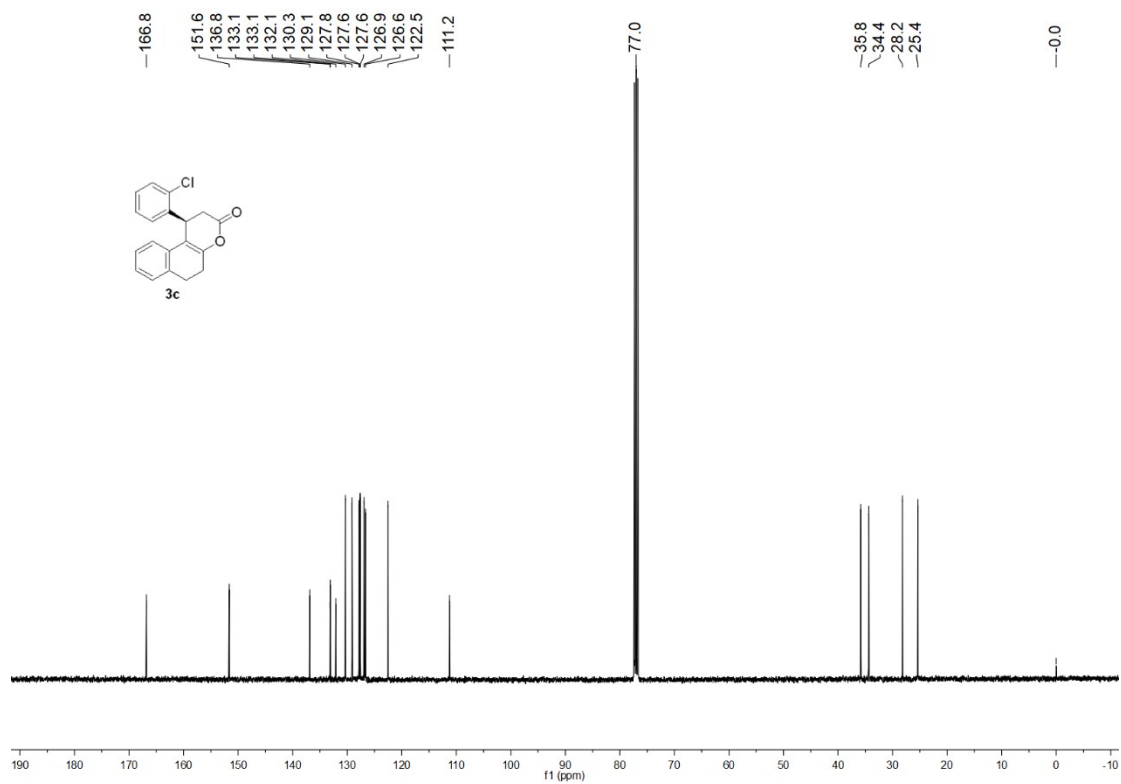

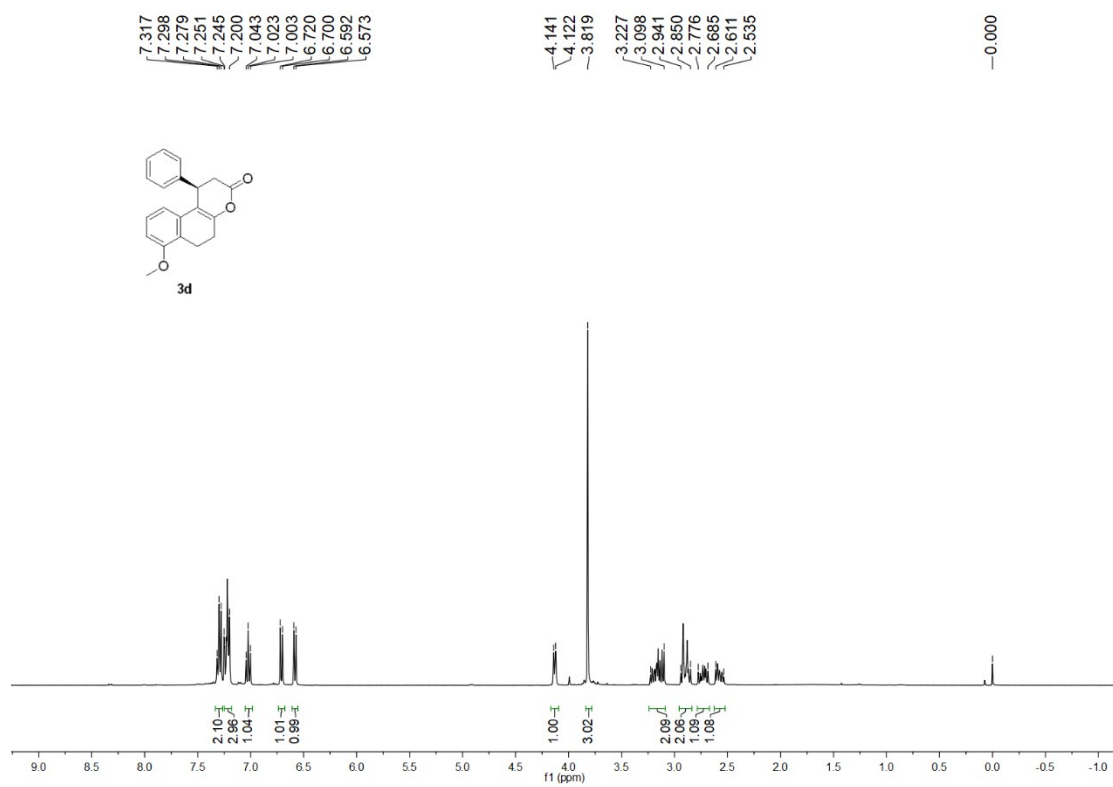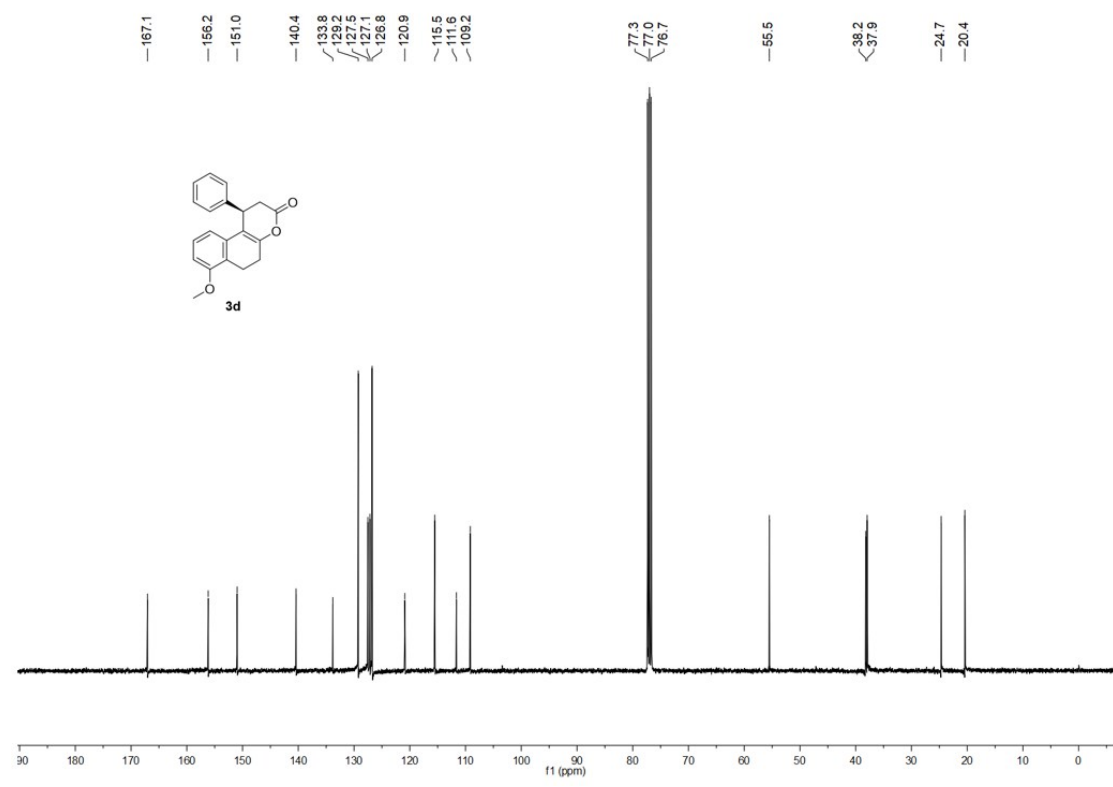

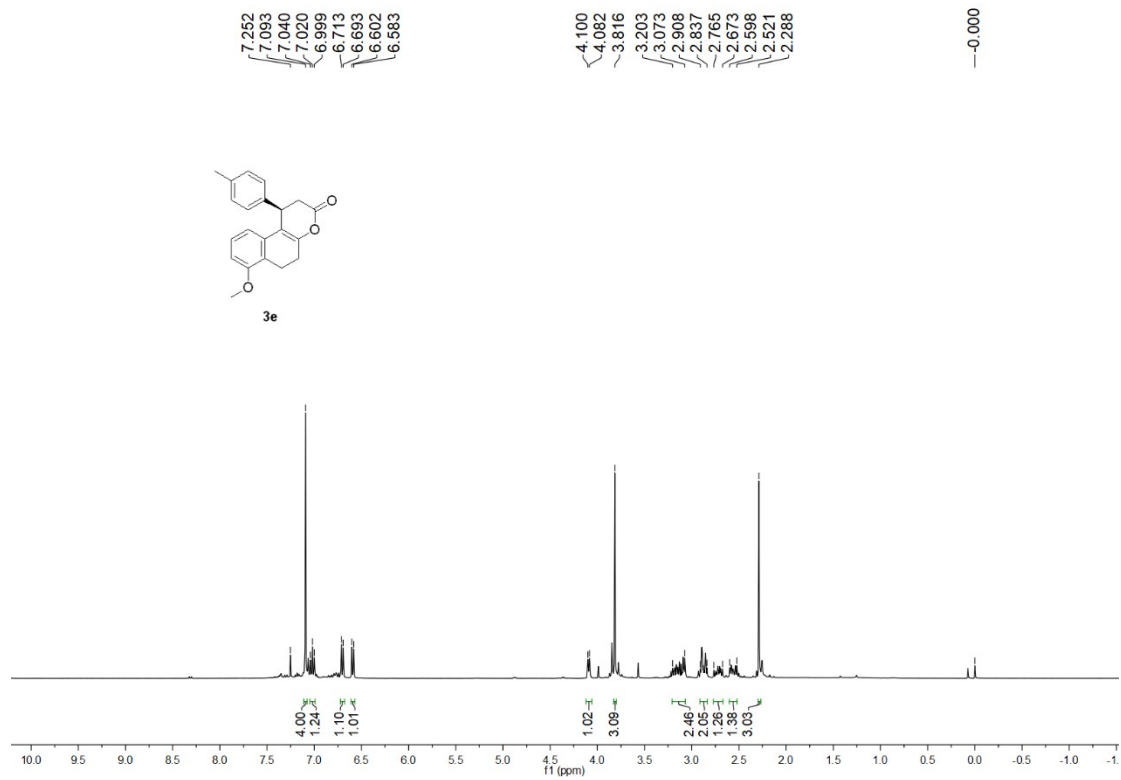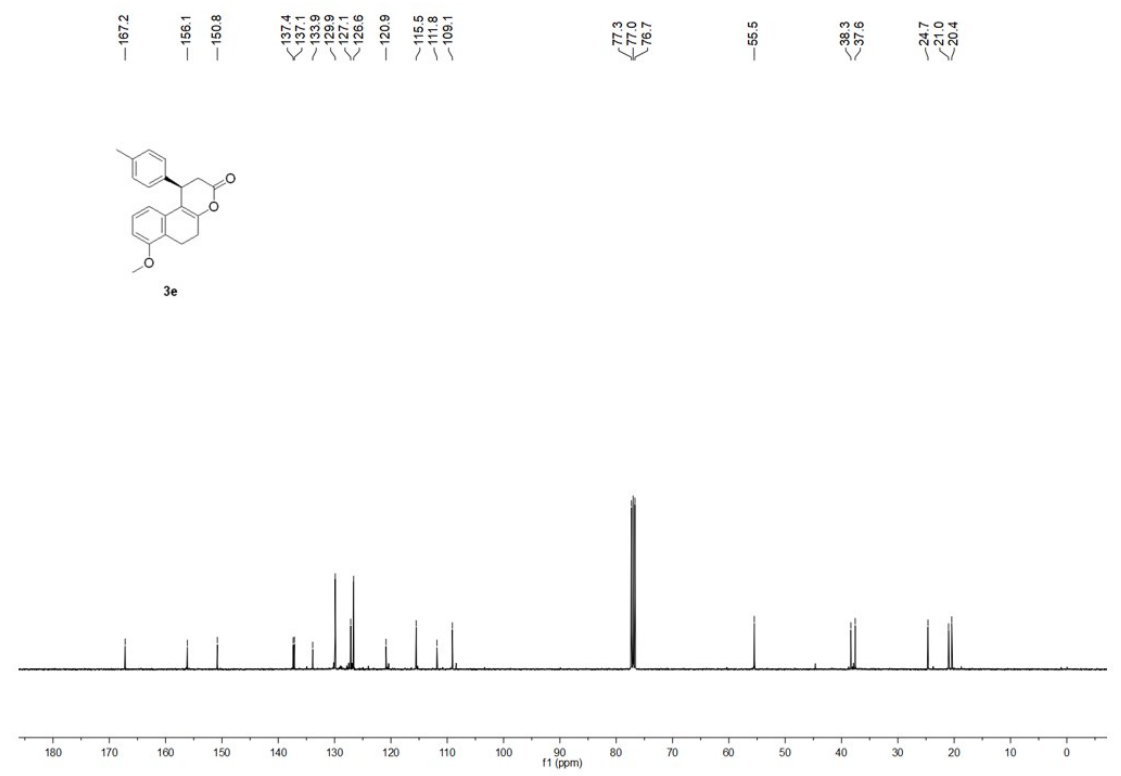



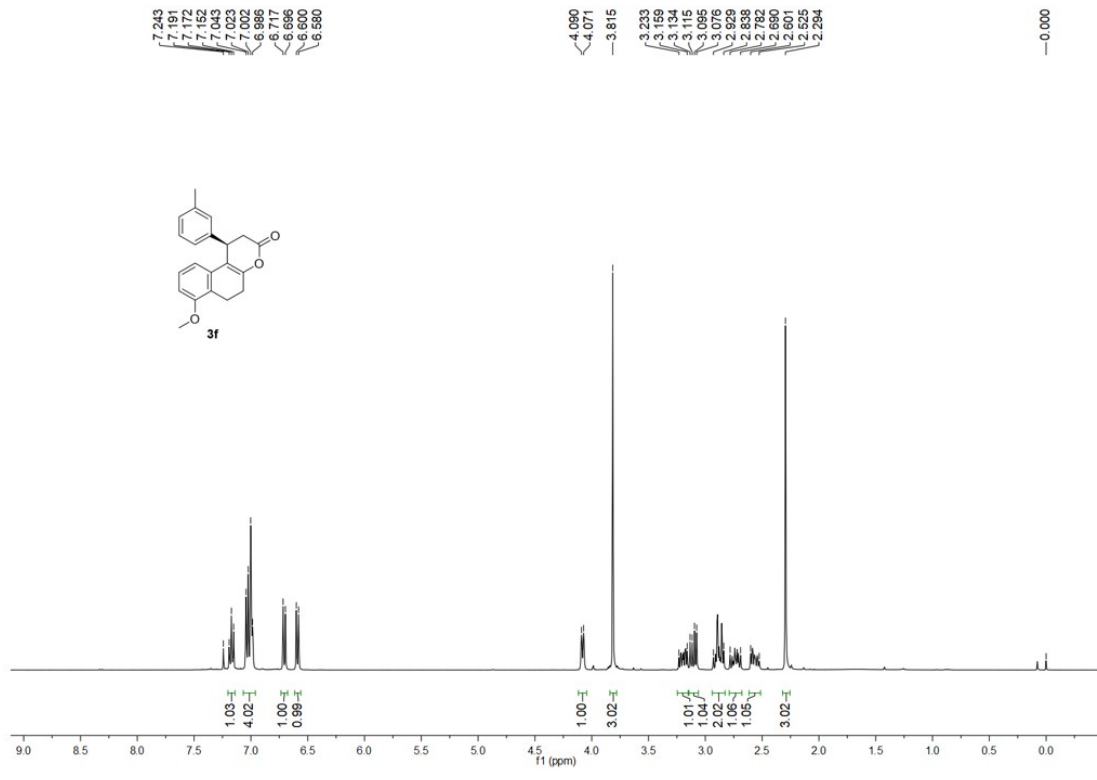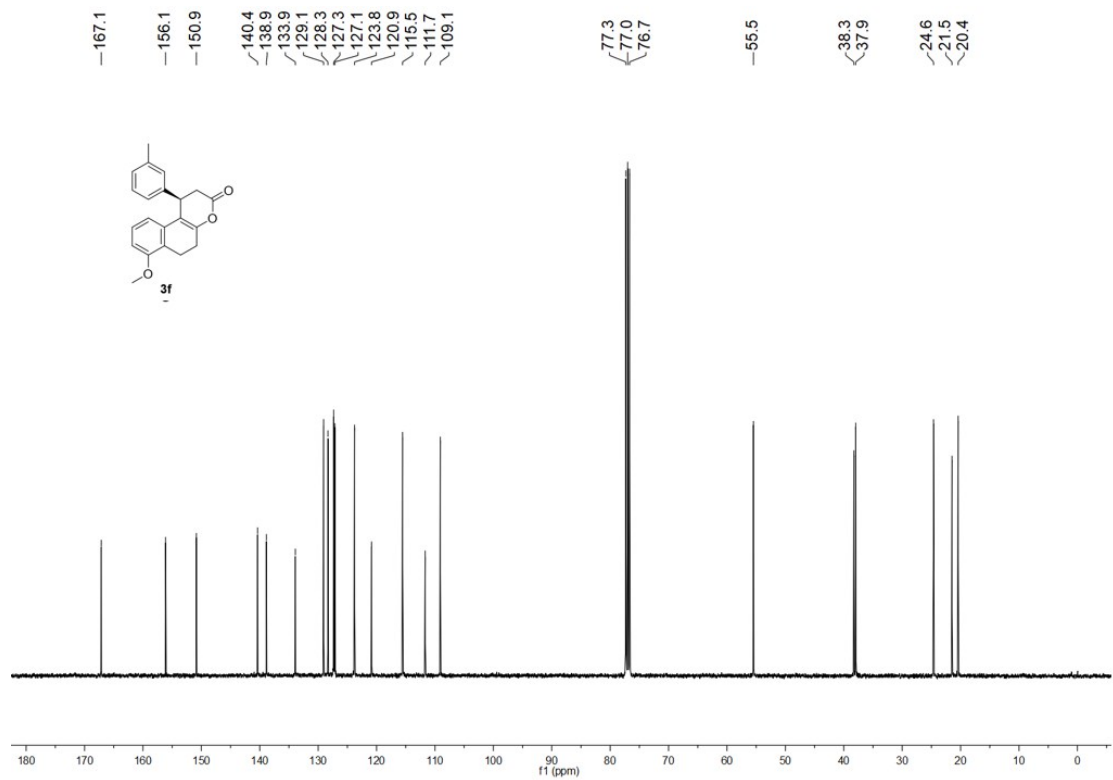

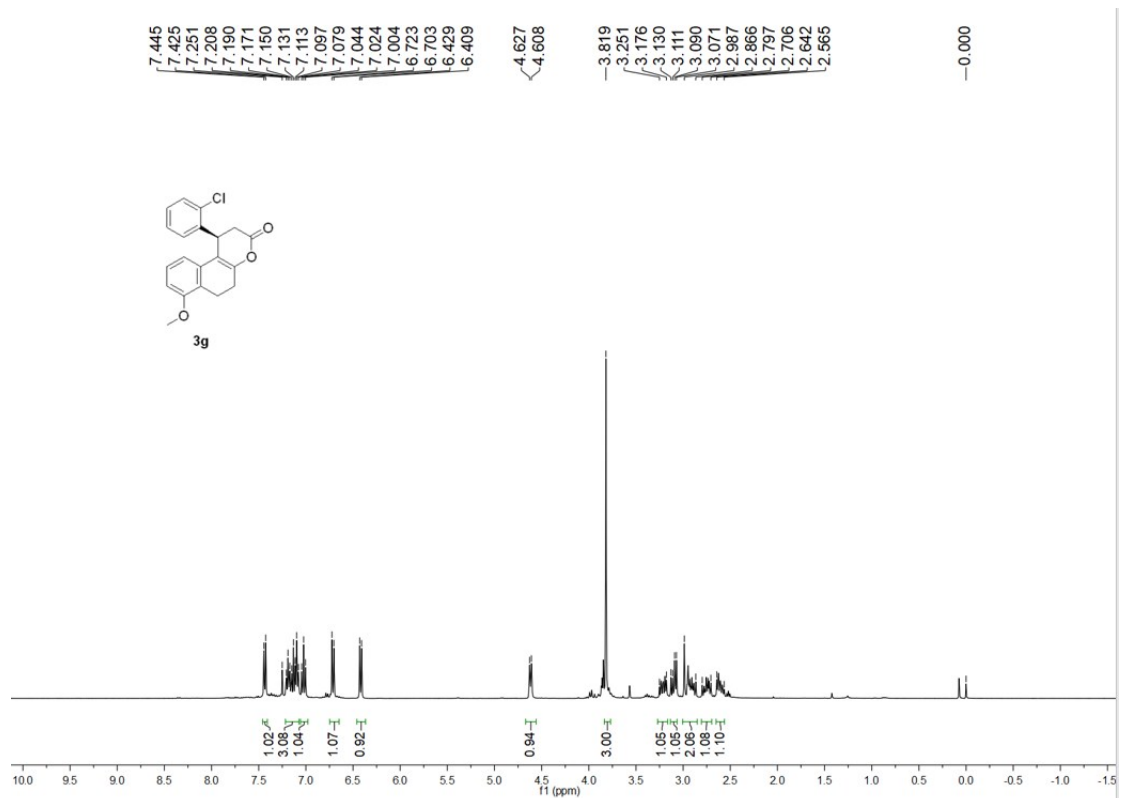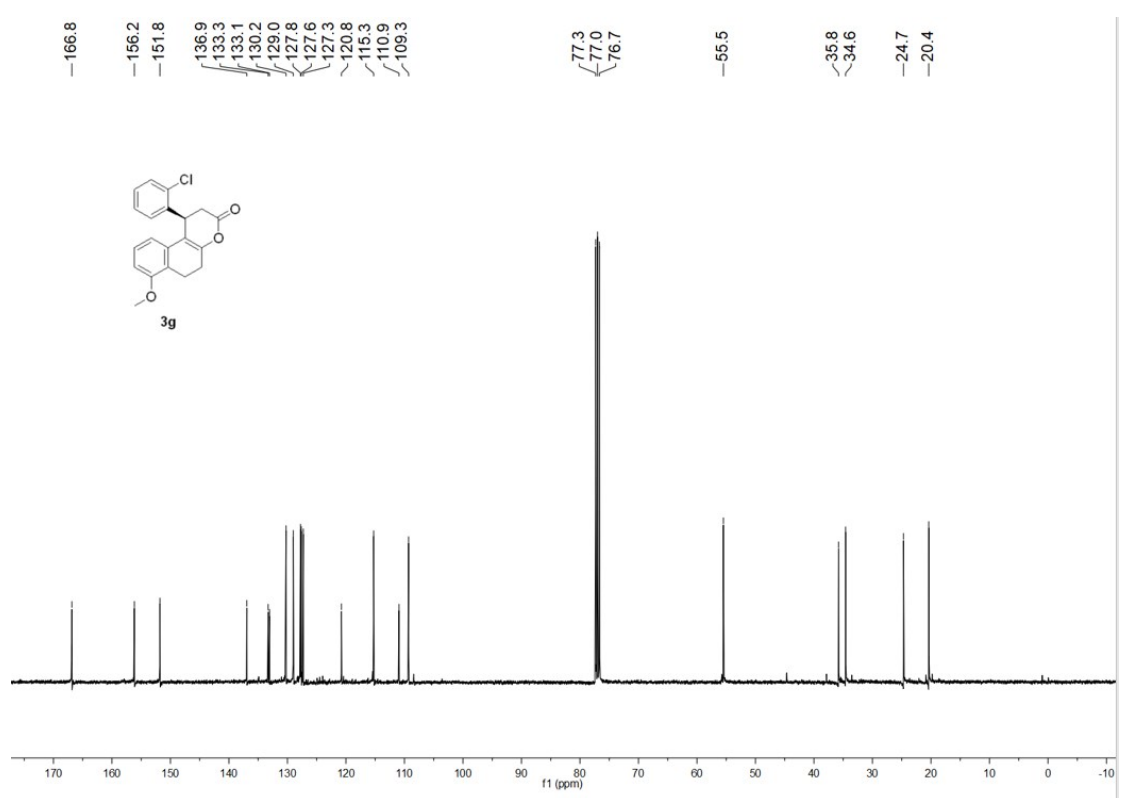

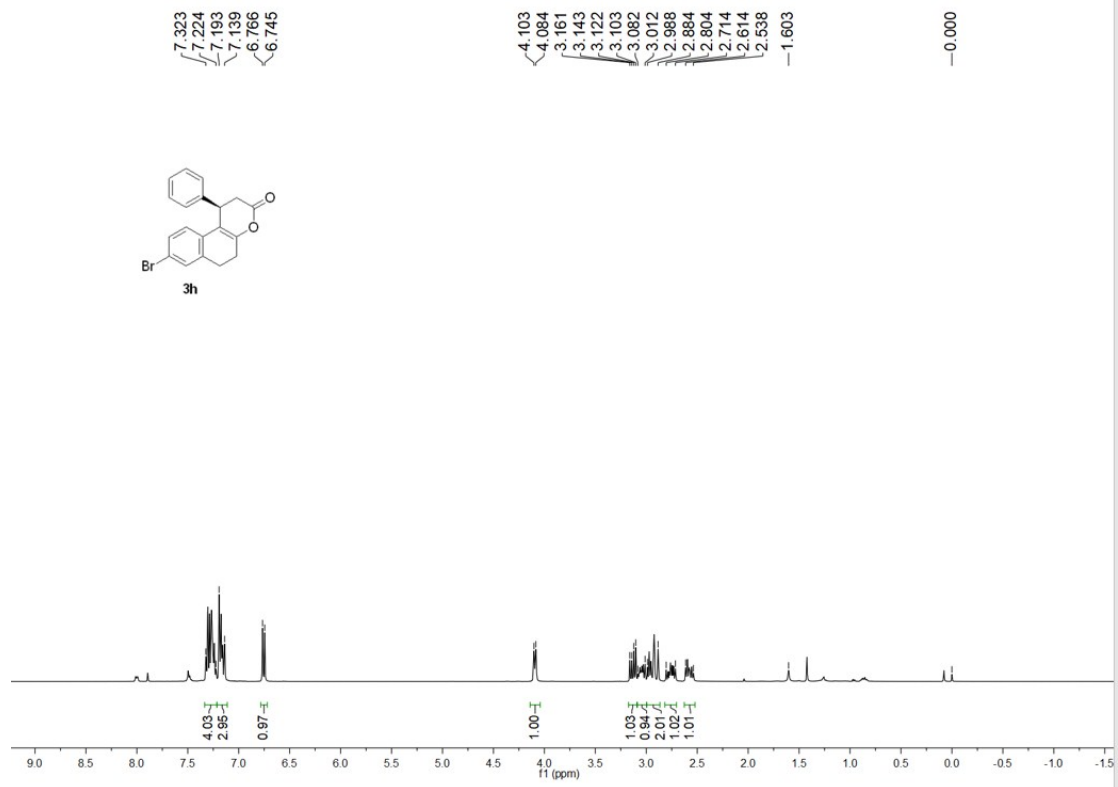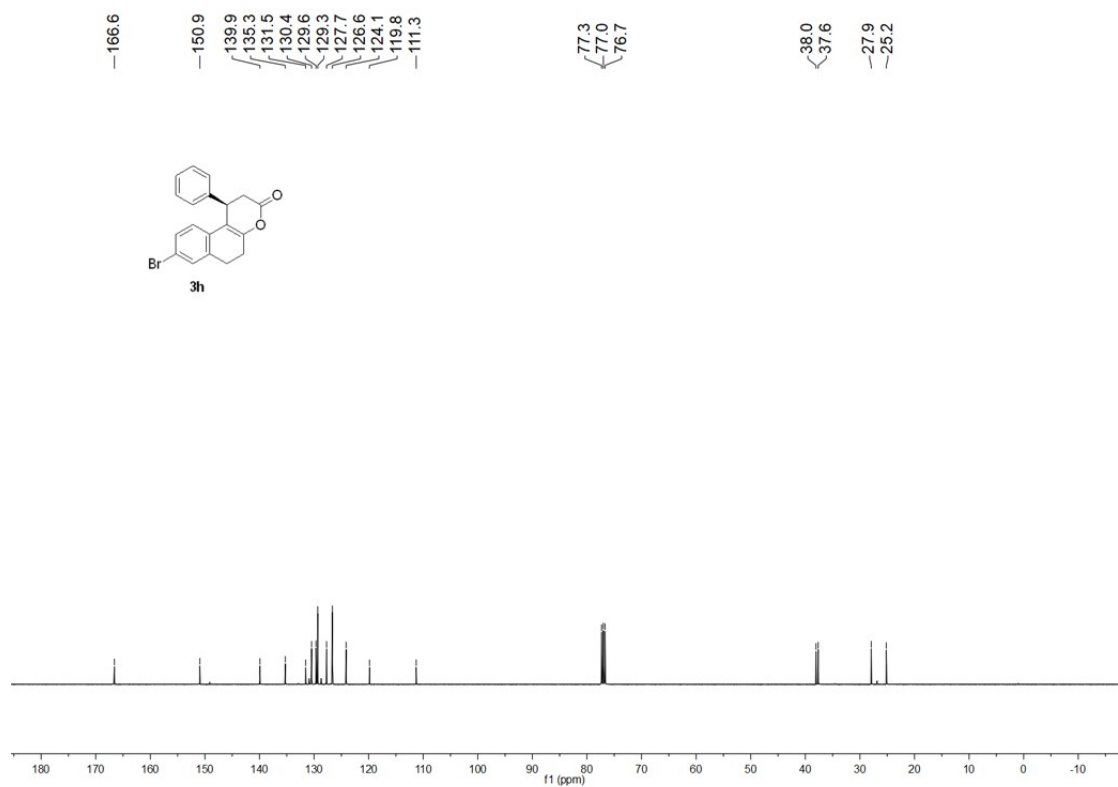

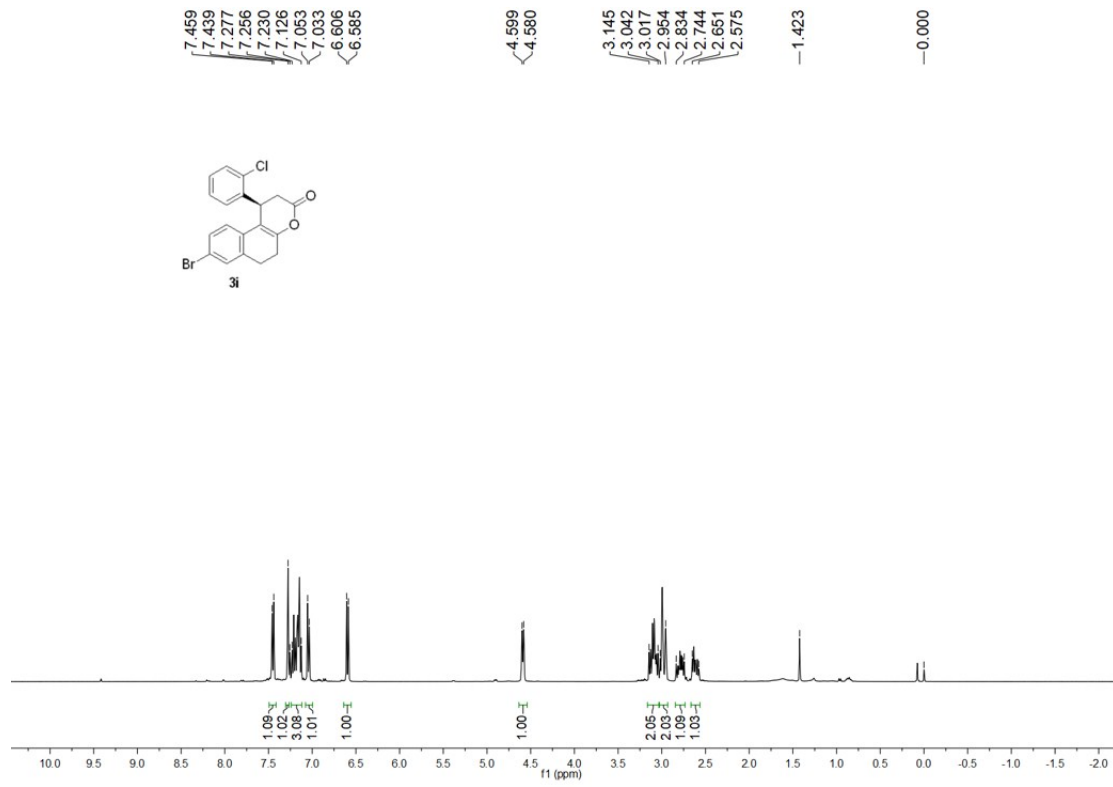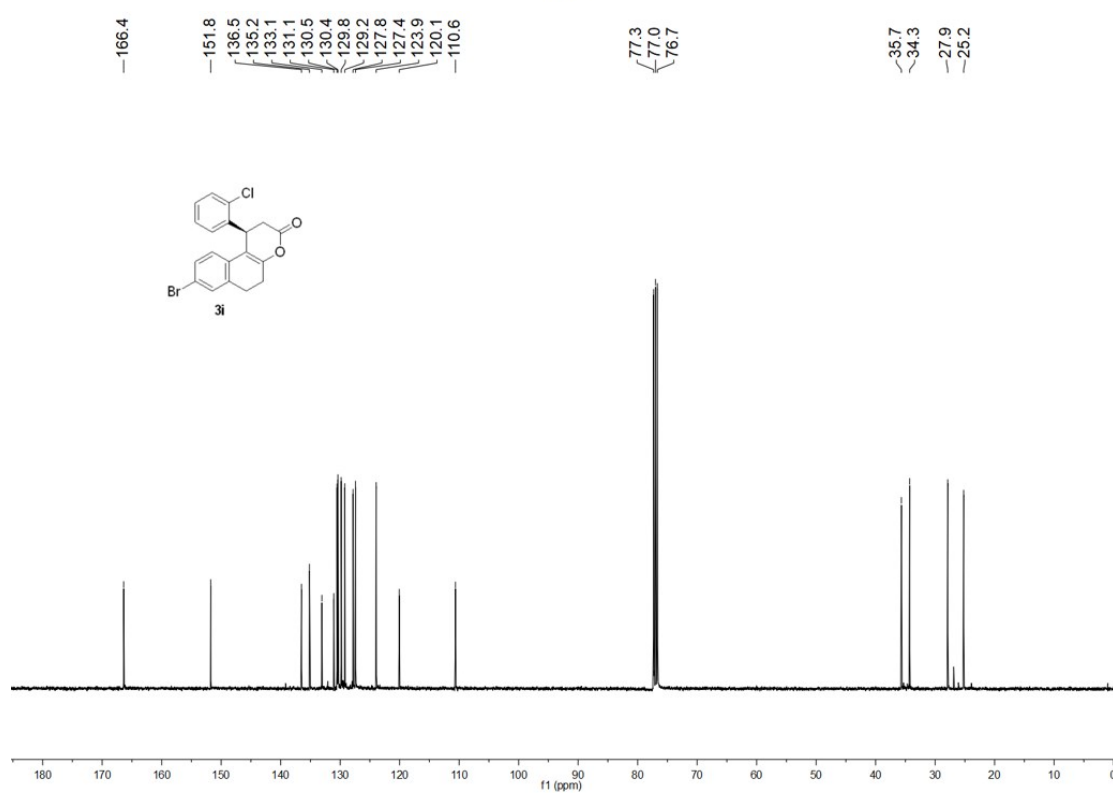

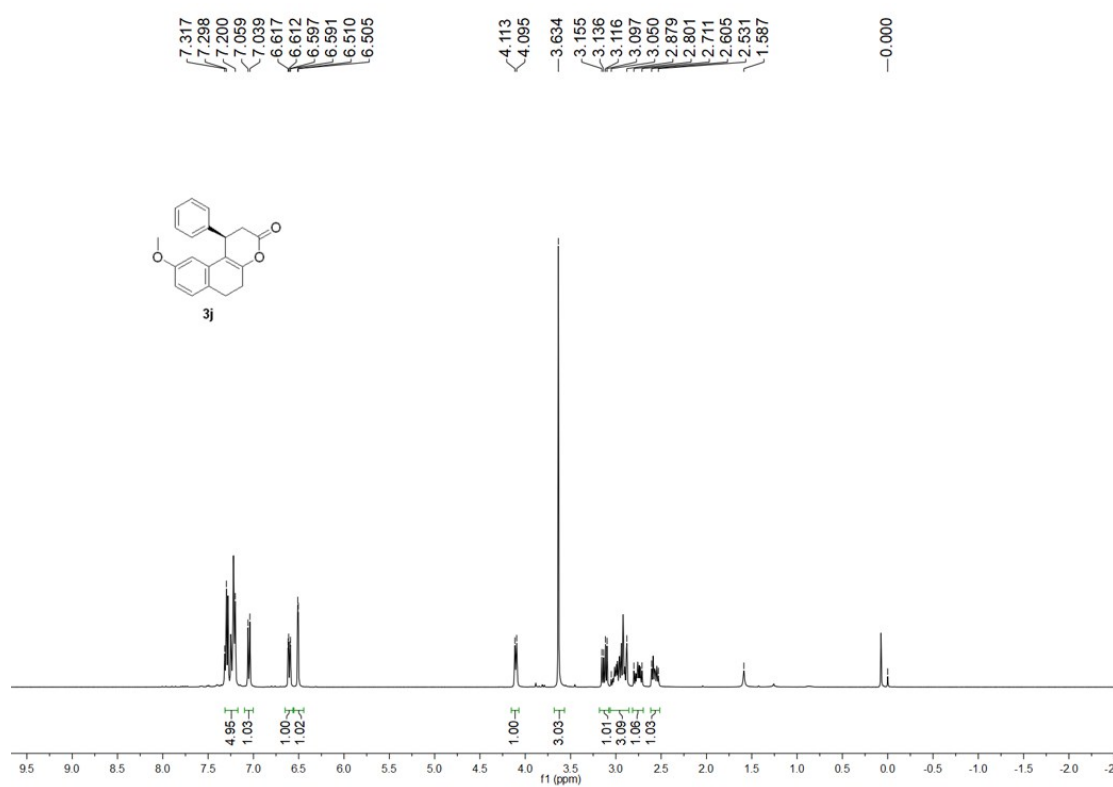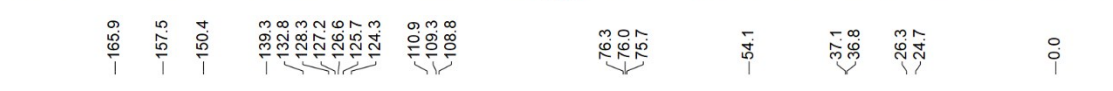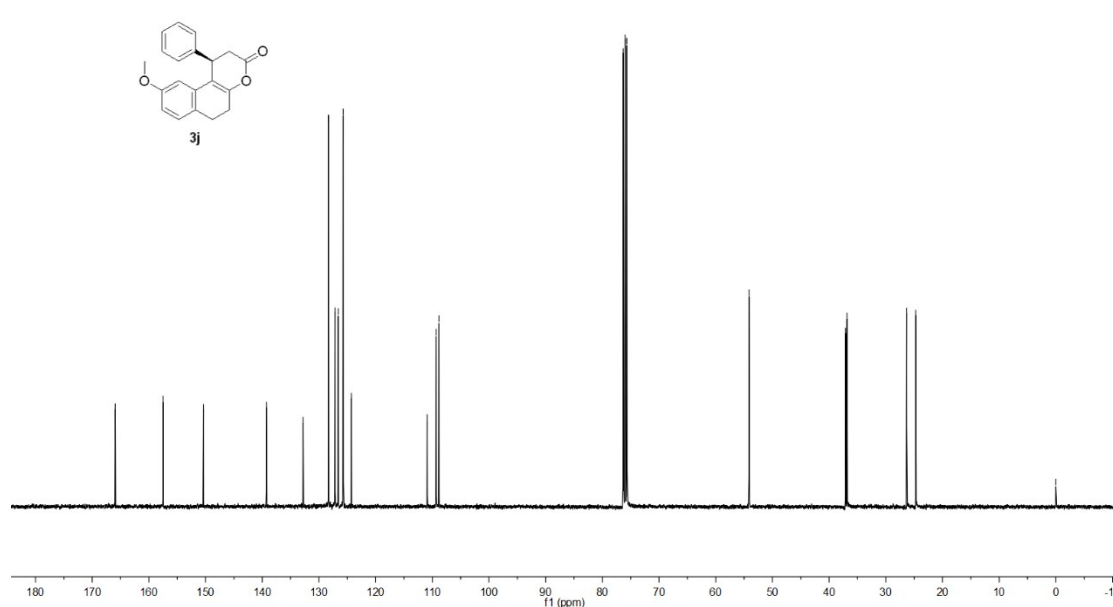

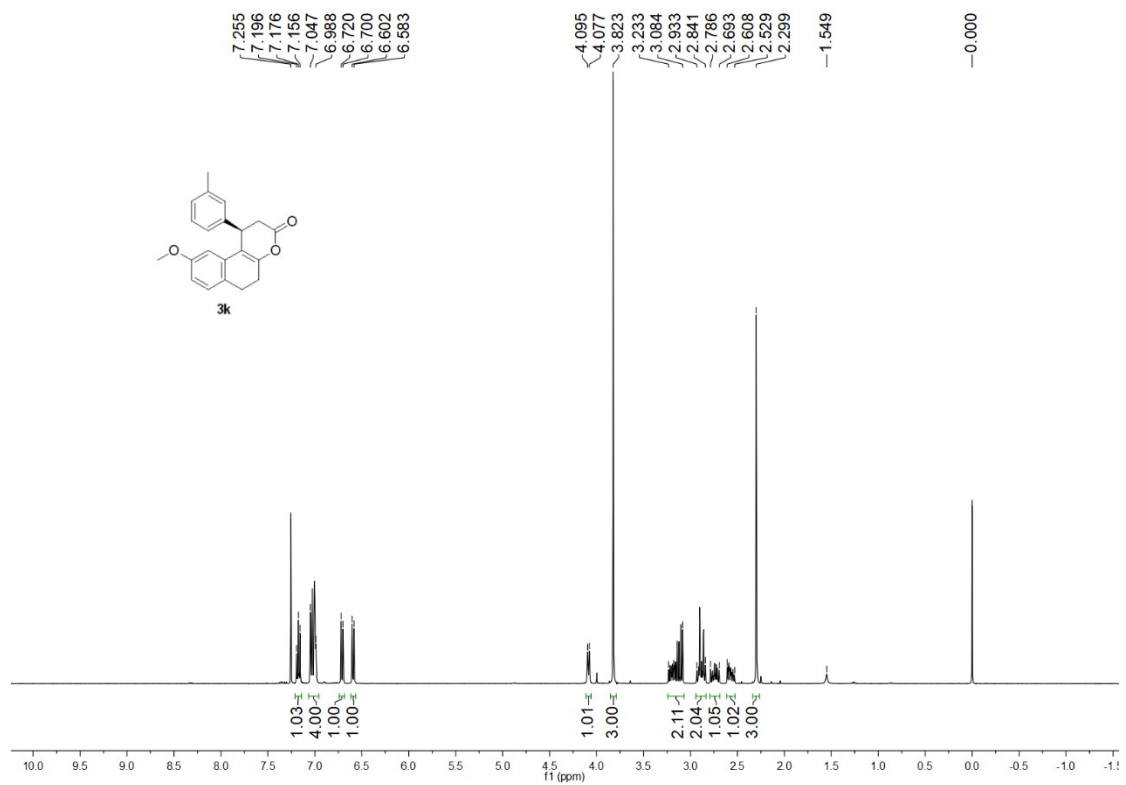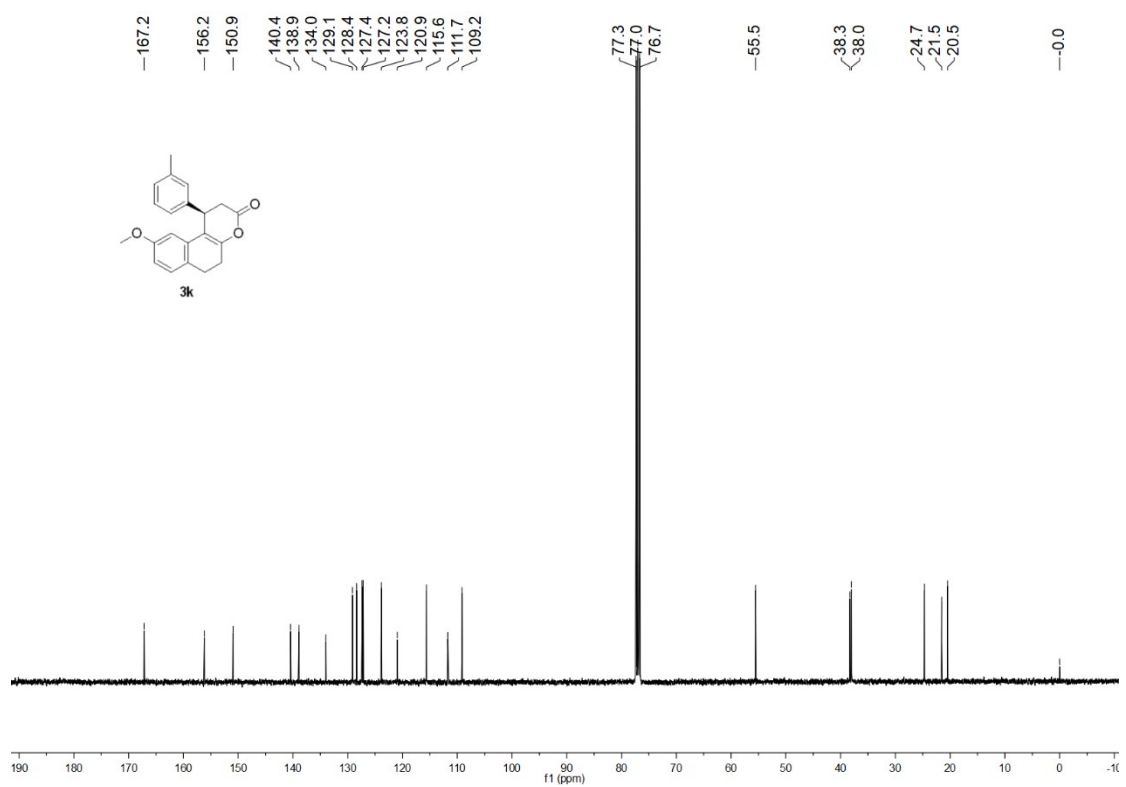

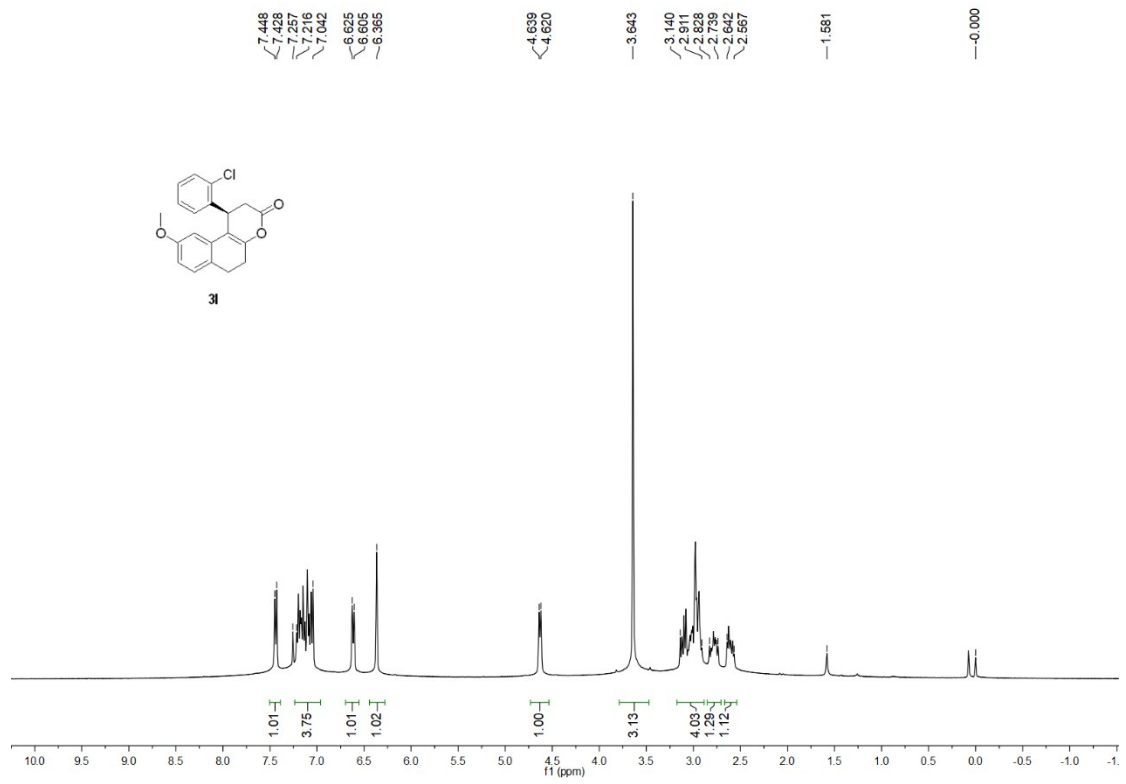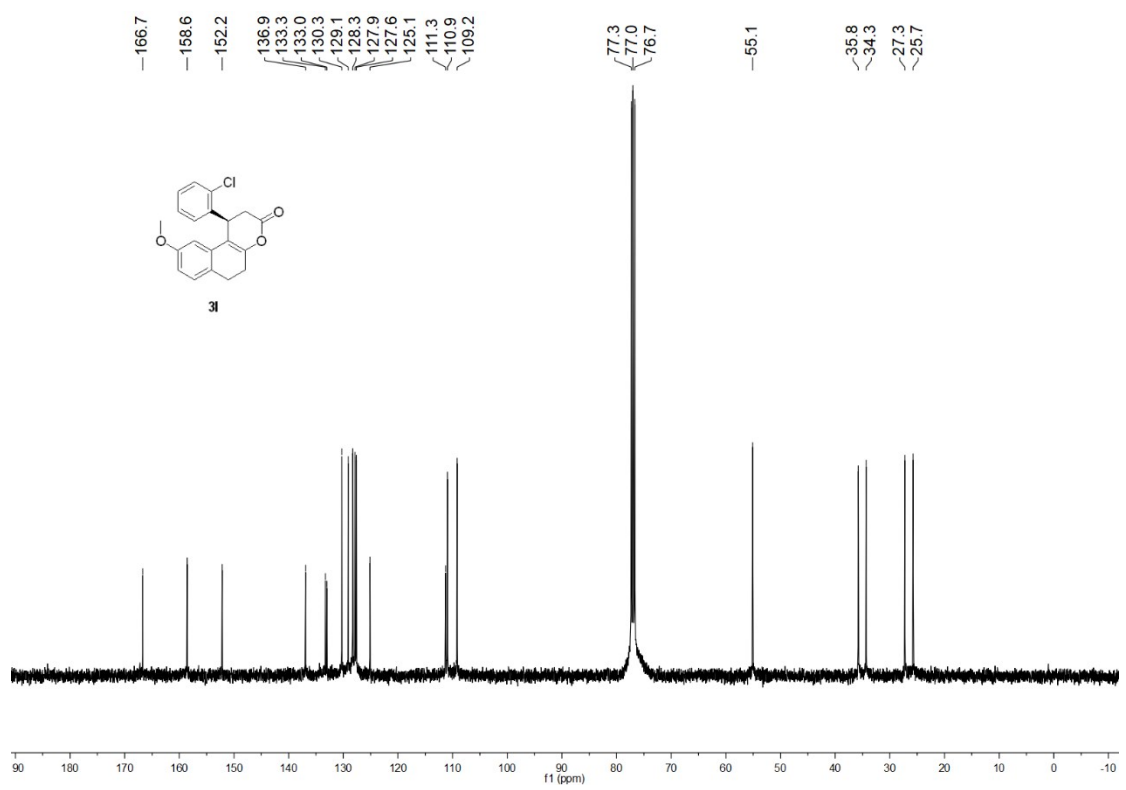

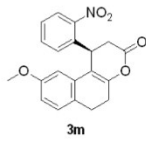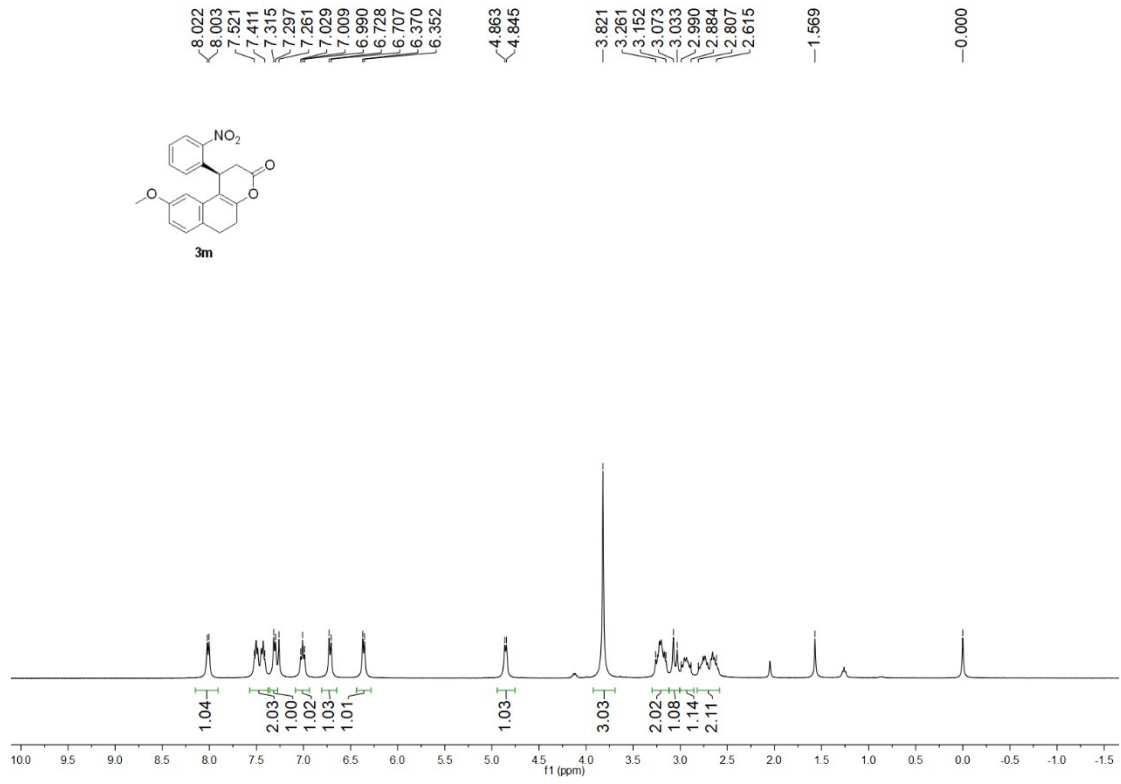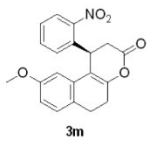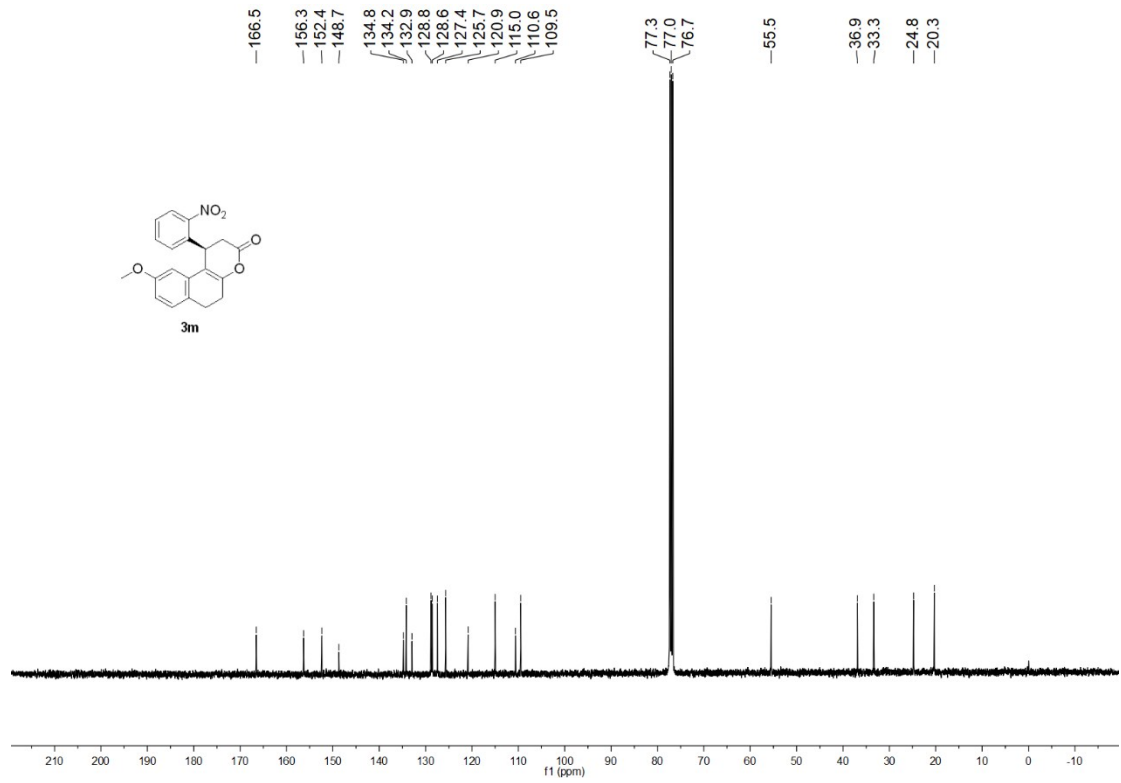



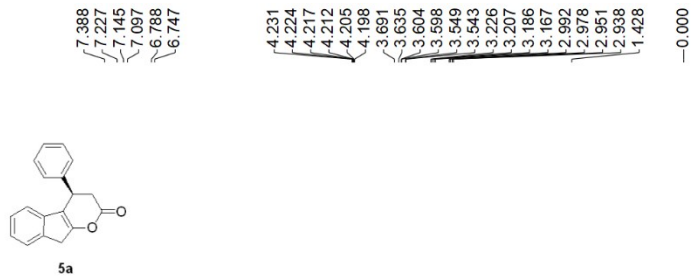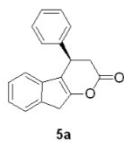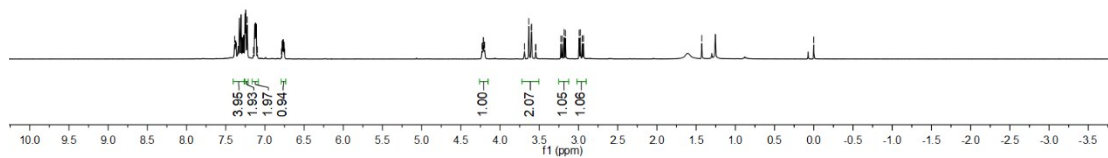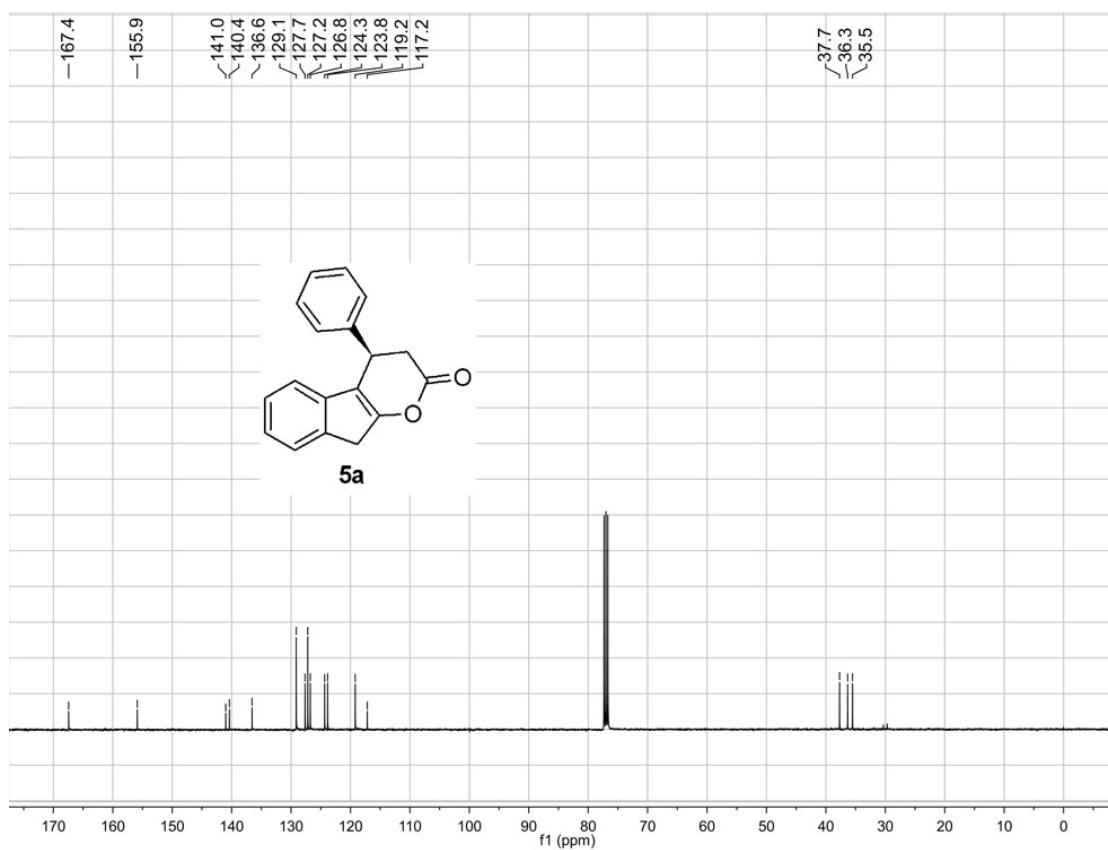

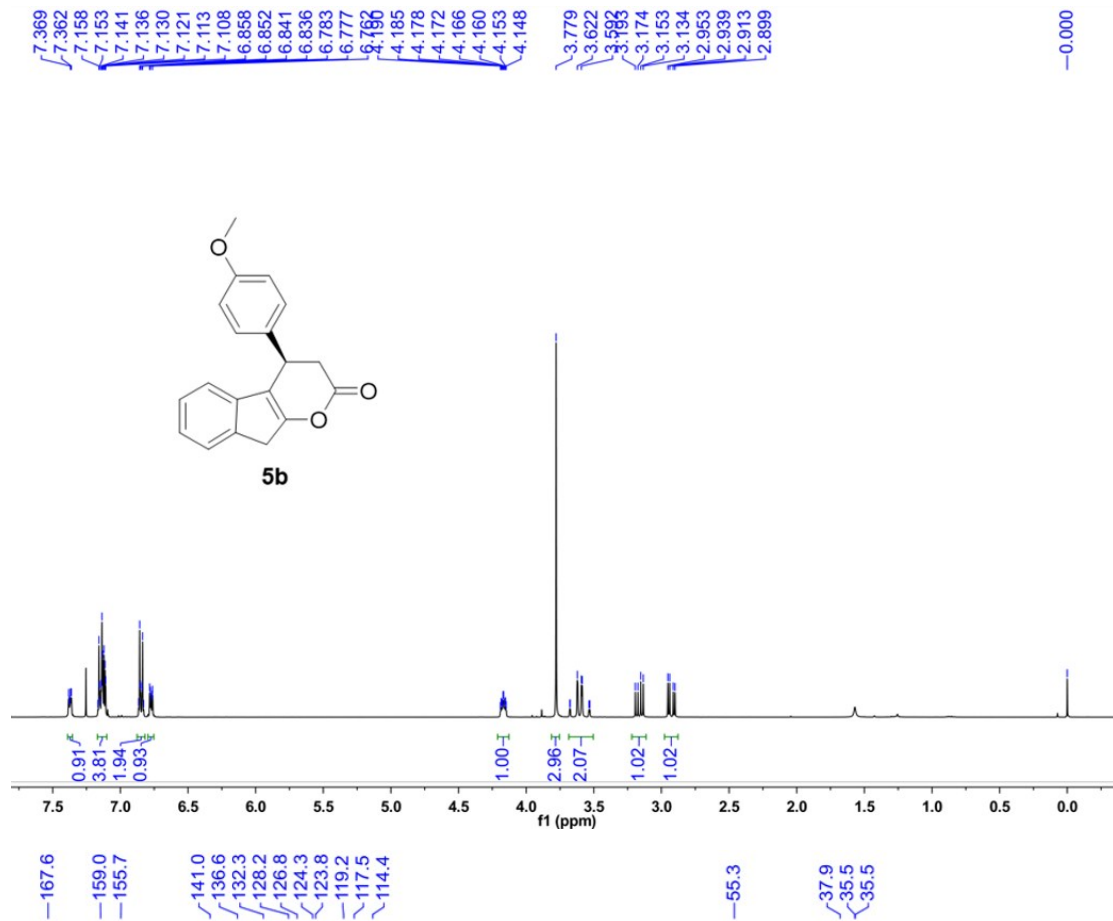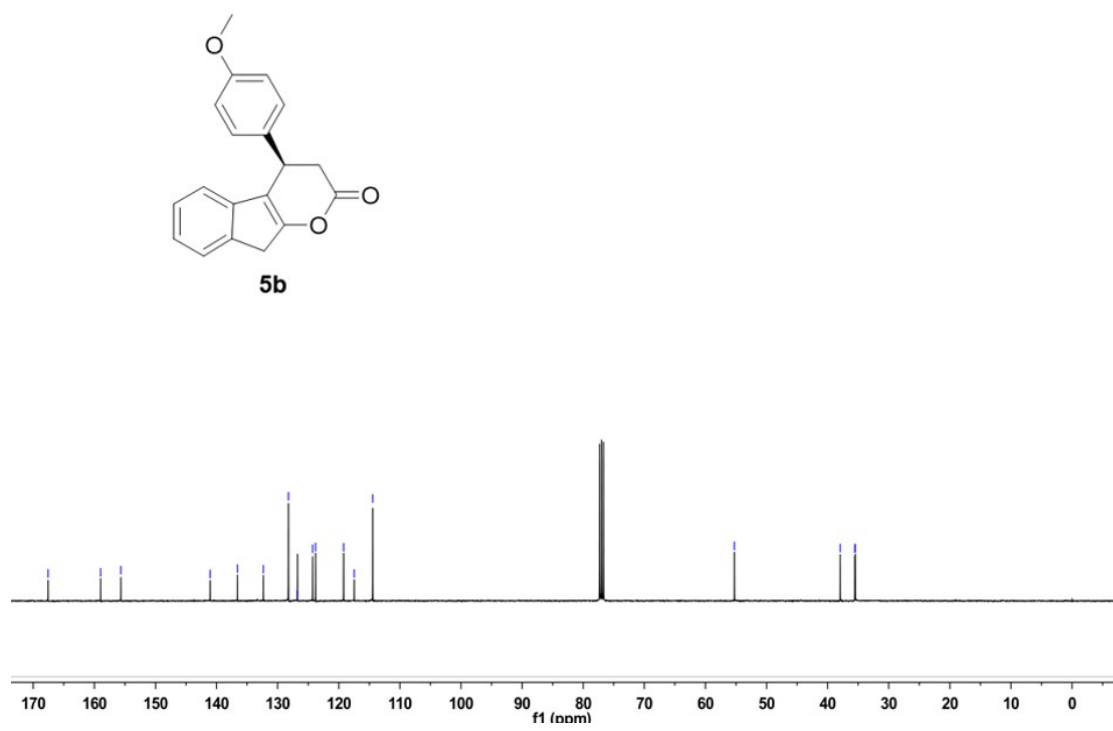

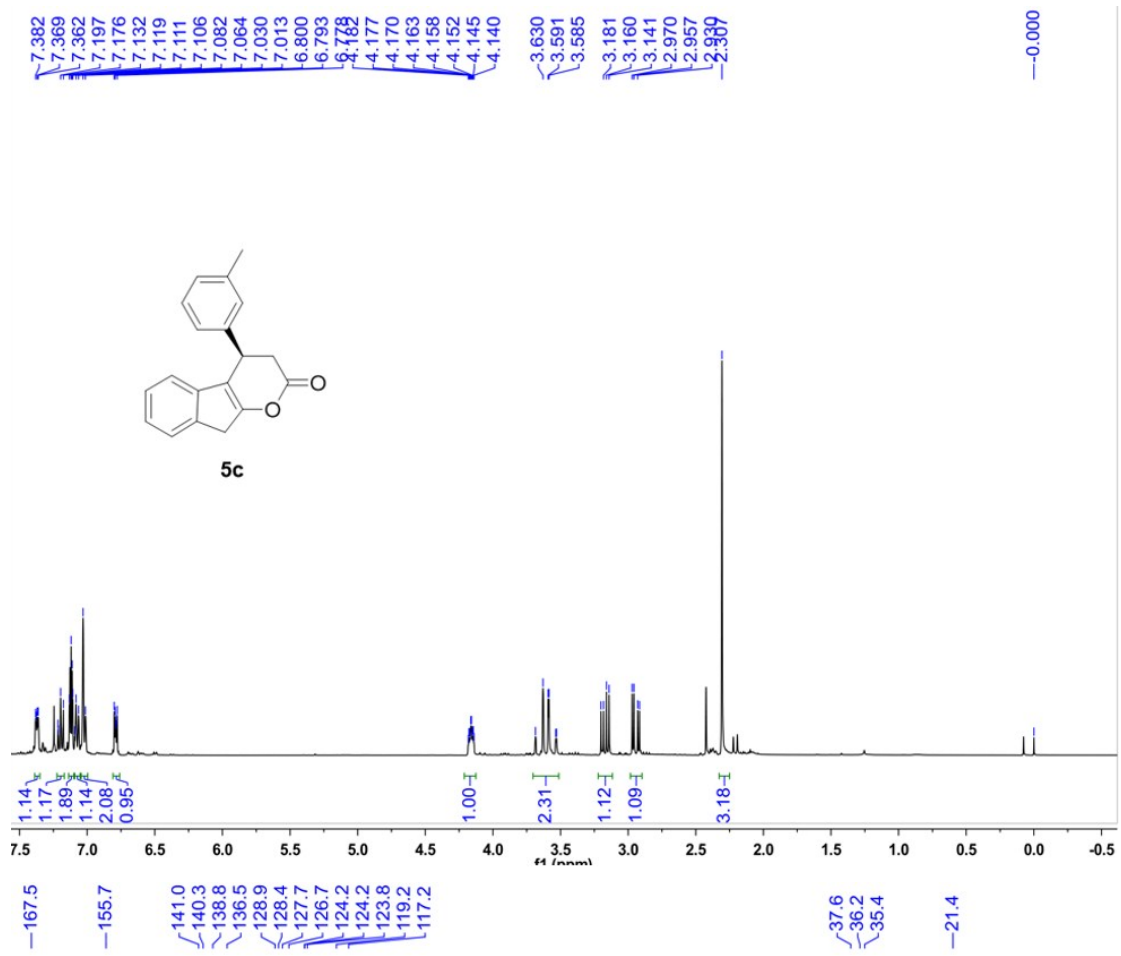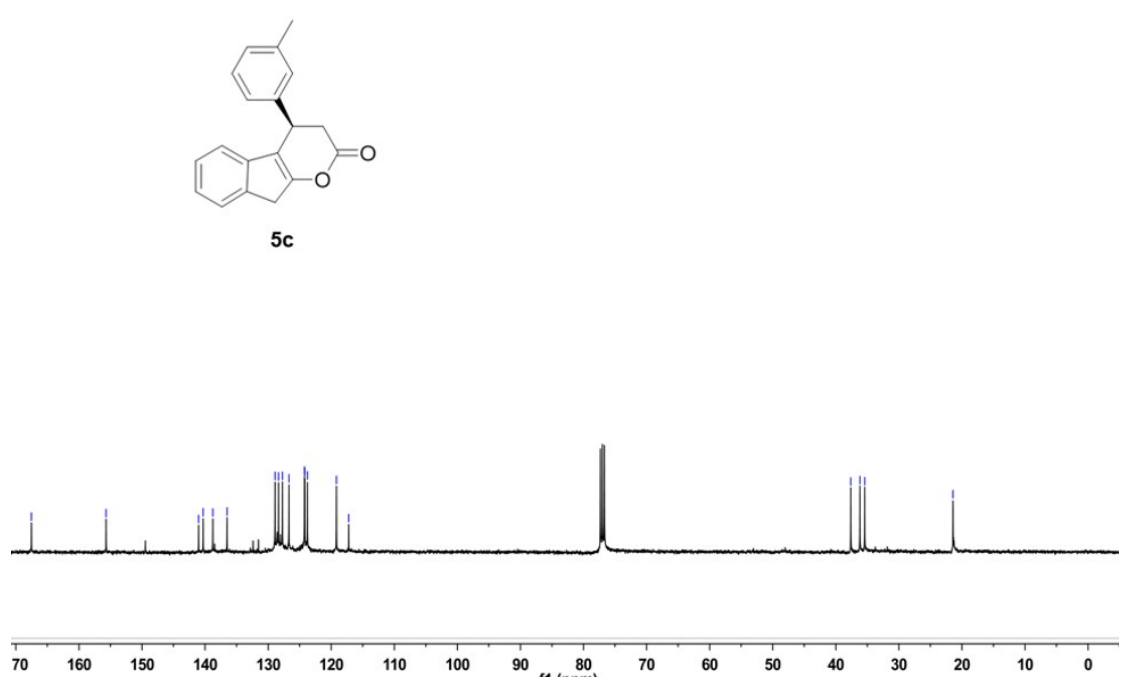

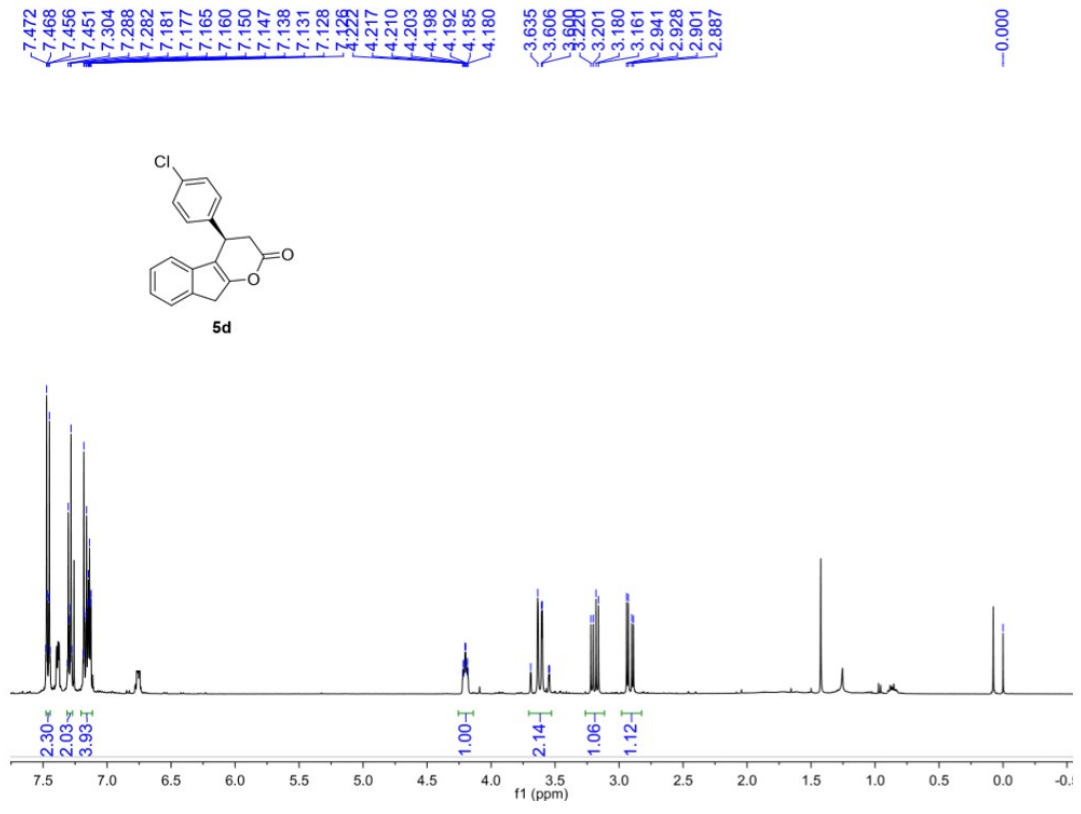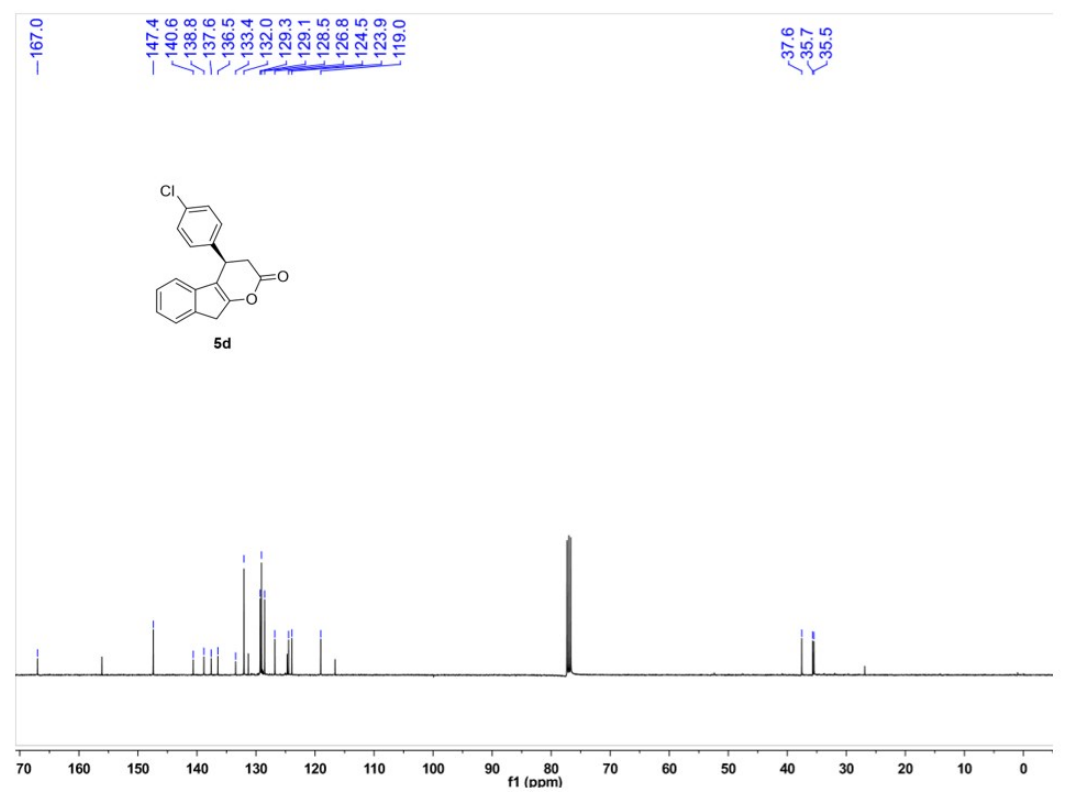

## Copies of HPLC Spectra of products

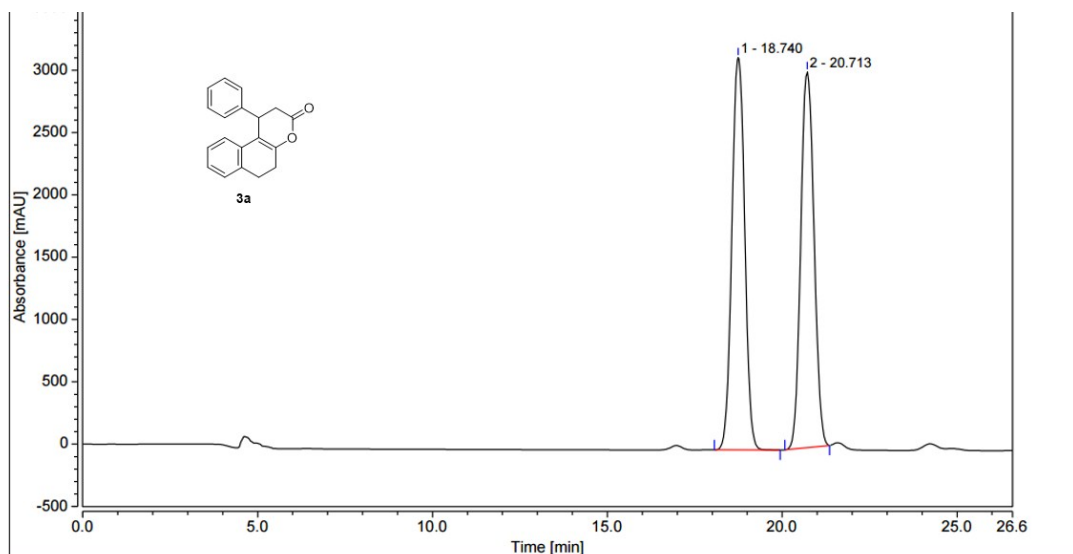

| Integration Results |           |                       |                 |                 |                    |                      |                |
|---------------------|-----------|-----------------------|-----------------|-----------------|--------------------|----------------------|----------------|
| No.                 | Peak Name | Retention Time<br>min | Area<br>mAU*min | Height<br>mAU   | Relative Area<br>% | Relative Height<br>% | Amount<br>n.a. |
| 1                   |           | 18.740                | 1336.960        | 3146.691        | 50.17              | 51.07                | n.a.           |
| 2                   |           | 20.713                | 1328.108        | 3015.376        | 49.83              | 48.93                | n.a.           |
| <b>Total:</b>       |           |                       | <b>2665.067</b> | <b>6162.068</b> | <b>100.00</b>      | <b>100.00</b>        |                |

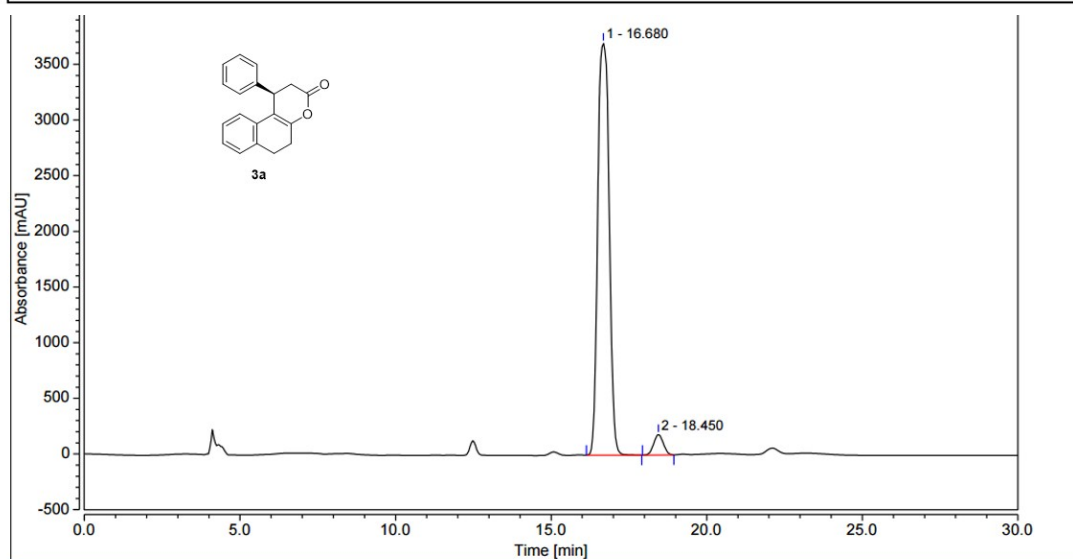

| Integration Results |           |                       |                 |                 |                    |                      |                |
|---------------------|-----------|-----------------------|-----------------|-----------------|--------------------|----------------------|----------------|
| No.                 | Peak Name | Retention Time<br>min | Area<br>mAU*min | Height<br>mAU   | Relative Area<br>% | Relative Height<br>% | Amount<br>n.a. |
| 1                   |           | 16.680                | 1570.203        | 3701.319        | 95.96              | 95.27                | n.a.           |
| 2                   |           | 18.450                | 66.046          | 183.880         | 4.04               | 4.73                 | n.a.           |
| <b>Total:</b>       |           |                       | <b>1636.248</b> | <b>3885.199</b> | <b>100.00</b>      | <b>100.00</b>        |                |

HPLC analysis: 92% ee, [Daicel Chiralpak IC, n-hexane/2-propanol = 90/10,  $v = 0.8$  mL/min,  $\lambda = 254$  nm,  $t$  (major) = 16.6 min,  $t$  (minor) = 18.4 min].

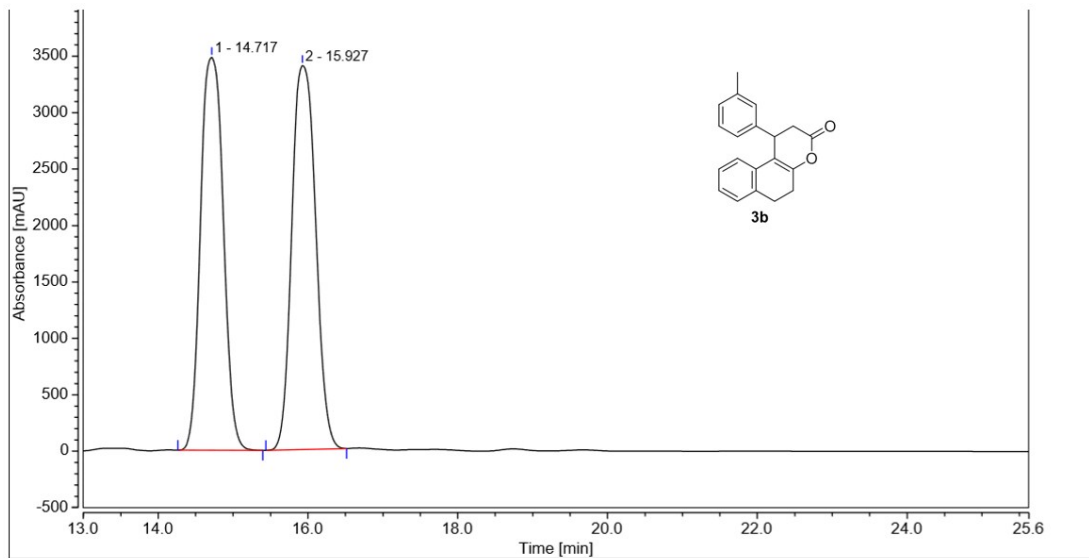

| Integration Results |           |                    |                 |                 |                 |                   |             |
|---------------------|-----------|--------------------|-----------------|-----------------|-----------------|-------------------|-------------|
| No.                 | Peak Name | Retention Time min | Area mAU*min    | Height mAU      | Relative Area % | Relative Height % | Amount n.a. |
| 1                   |           | 14.717             | 1225.798        | 3482.891        | 49.36           | 50.57             | n.a.        |
| 2                   |           | 15.927             | 1257.362        | 3404.522        | 50.64           | 49.43             | n.a.        |
| <b>Total:</b>       |           |                    | <b>2483.160</b> | <b>6887.412</b> | <b>100.00</b>   | <b>100.00</b>     |             |

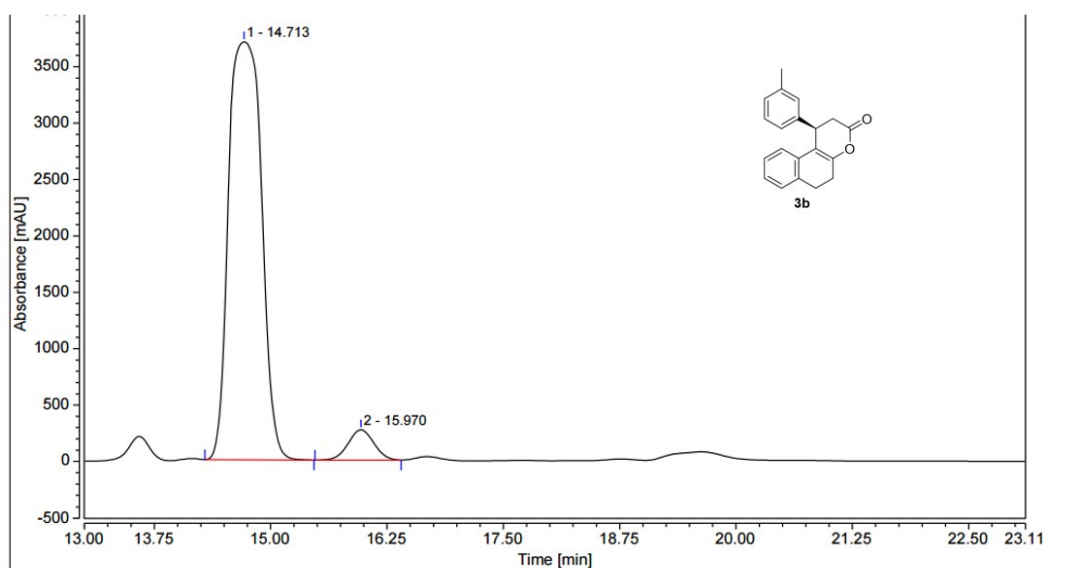

| Integration Results |           |                    |                 |                 |                 |                   |             |
|---------------------|-----------|--------------------|-----------------|-----------------|-----------------|-------------------|-------------|
| No.                 | Peak Name | Retention Time min | Area mAU*min    | Height mAU      | Relative Area % | Relative Height % | Amount n.a. |
| 1                   |           | 14.713             | 1522.953        | 3708.094        | 94.66           | 93.24             | n.a.        |
| 2                   |           | 15.970             | 85.945          | 268.633         | 5.34            | 6.76              | n.a.        |
| <b>Total:</b>       |           |                    | <b>1608.898</b> | <b>3976.727</b> | <b>100.00</b>   | <b>100.00</b>     |             |

HPLC analysis: 89% ee, [Daicel Chiralpak IC, n-hexane/2-propanol = 90/10,  $v = 0.8$  mL/min,  $\lambda = 254$  nm,  $t$  (major) = 14.7 min,  $t$  (minor) = 15.9 min].

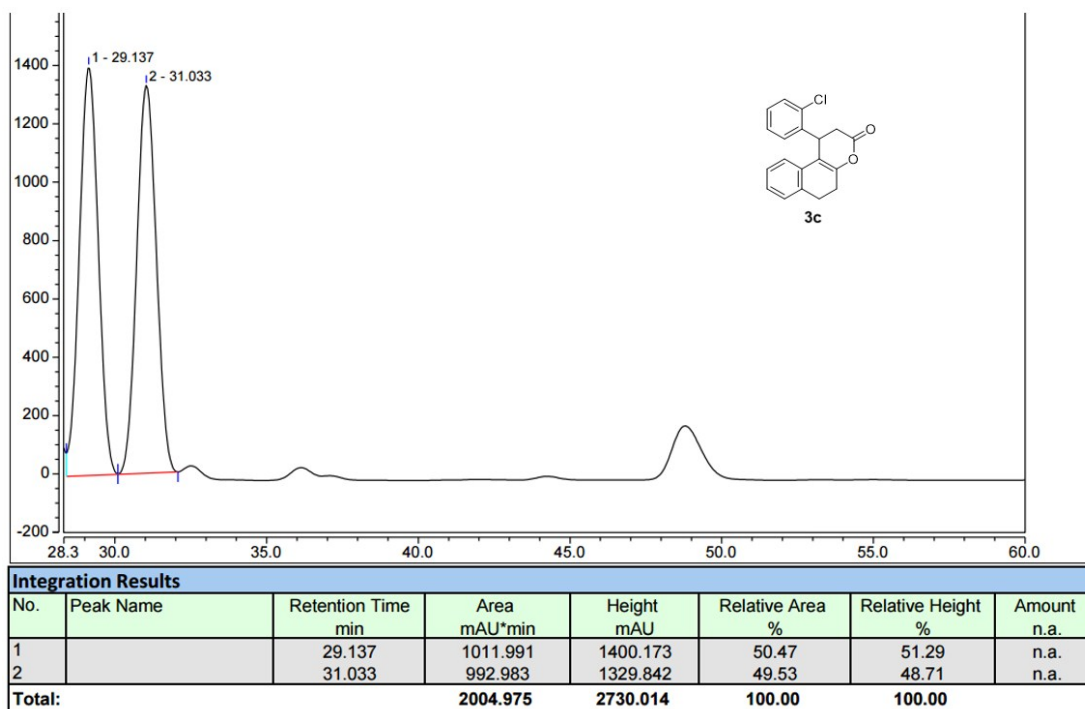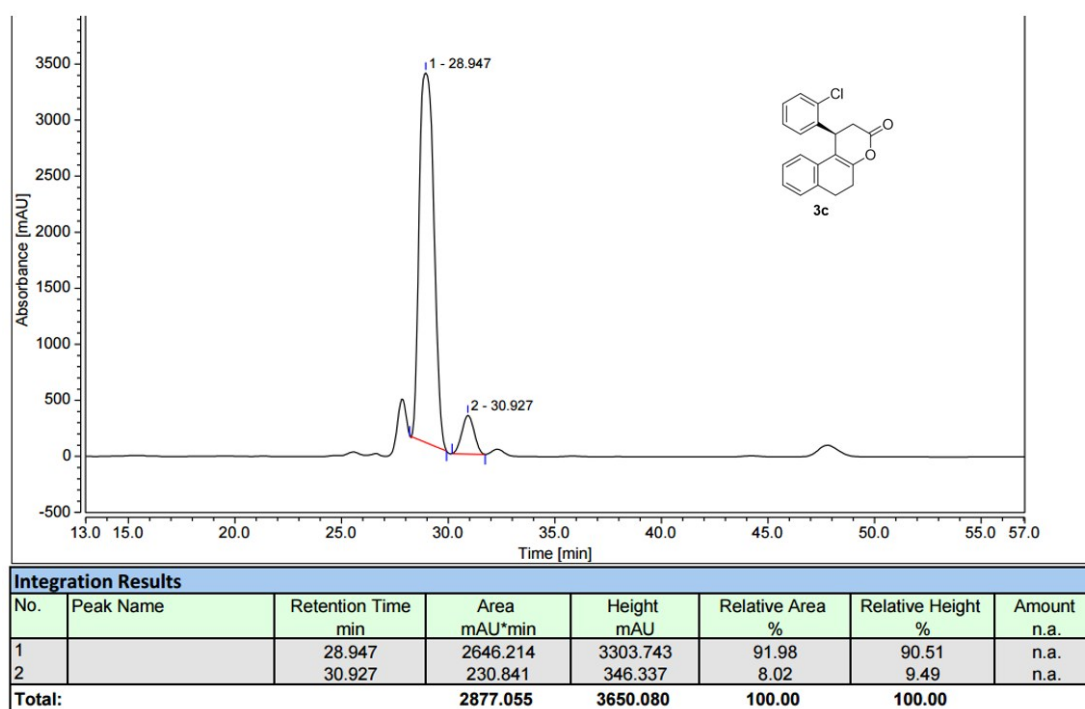

HPLC analysis: 84% ee, [Daicel Chiralpak IC, n-hexane/2-propanol = 98/2,  $v = 0.6$  mL/min,  $\lambda = 254$  nm,  $t$  (major) = 28.9 min,  $t$  (minor) = 30.9 min].

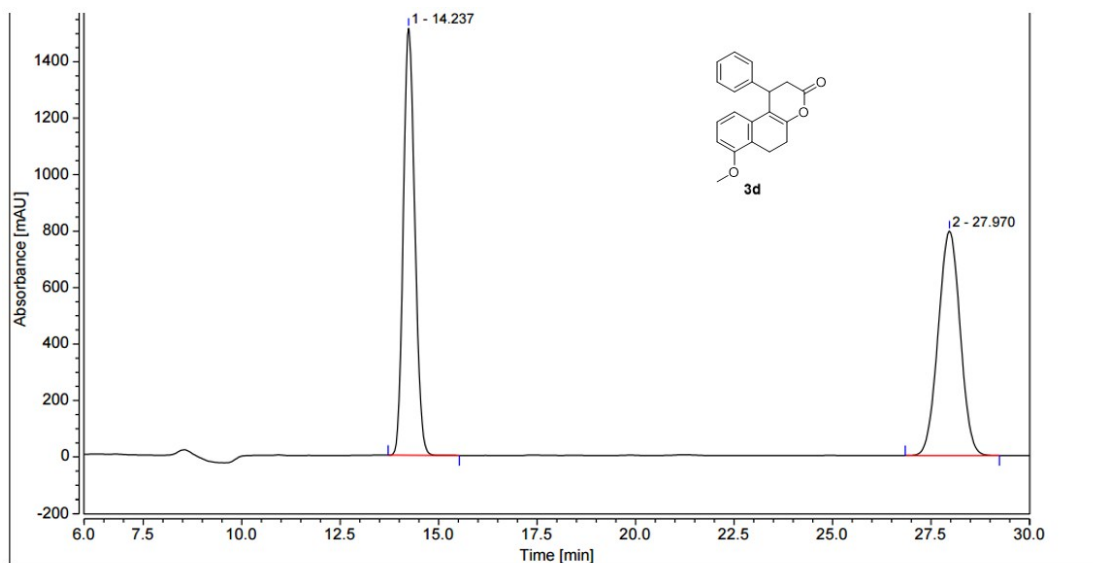

| Integration Results |           |                    |                 |                 |                 |                   |        |
|---------------------|-----------|--------------------|-----------------|-----------------|-----------------|-------------------|--------|
| No.                 | Peak Name | Retention Time min | Area mAU*min    | Height mAU      | Relative Area % | Relative Height % | Amount |
| 1                   |           | 14.237             | 512.568         | 1512.788        | 49.91           | 65.53             | n.a.   |
| 2                   |           | 27.970             | 514.388         | 795.917         | 50.09           | 34.47             | n.a.   |
| <b>Total:</b>       |           |                    | <b>1026.956</b> | <b>2308.705</b> | <b>100.00</b>   | <b>100.00</b>     |        |

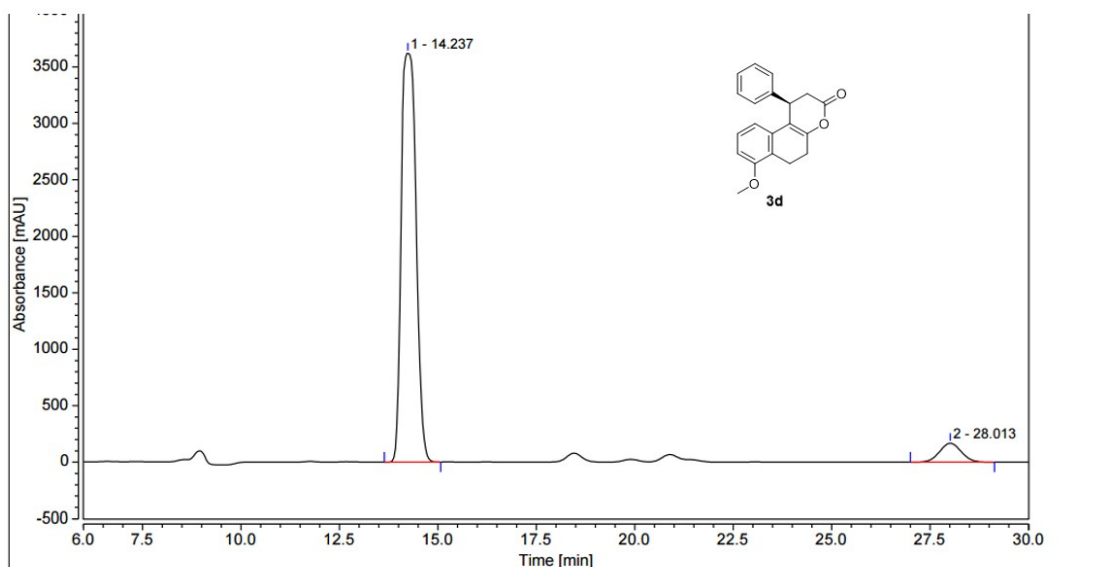

| Integration Results |           |                    |                 |                 |                 |                   |        |
|---------------------|-----------|--------------------|-----------------|-----------------|-----------------|-------------------|--------|
| No.                 | Peak Name | Retention Time min | Area mAU*min    | Height mAU      | Relative Area % | Relative Height % | Amount |
| 1                   |           | 14.237             | 1589.460        | 3622.916        | 93.78           | 95.62             | n.a.   |
| 2                   |           | 28.013             | 105.431         | 165.993         | 6.22            | 4.38              | n.a.   |
| <b>Total:</b>       |           |                    | <b>1694.891</b> | <b>3788.909</b> | <b>100.00</b>   | <b>100.00</b>     |        |

HPLC analysis: 88% ee, [Daicel Chiralpak OZ-H, n-hexane/2-propanol = 90/10,  $v = 0.8$  mL/min,  $\lambda = 254$  nm,  $t$  (major) = 14.2 min,  $t$  (minor) = 28.0 min].



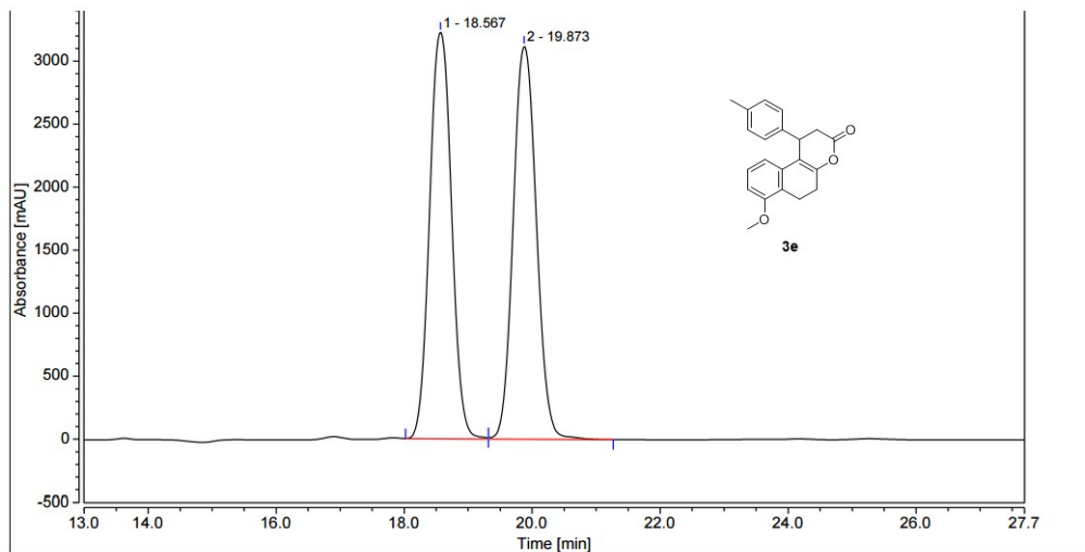

| Integration Results |           |                    |                 |                 |                 |                   |             |
|---------------------|-----------|--------------------|-----------------|-----------------|-----------------|-------------------|-------------|
| No.                 | Peak Name | Retention Time min | Area mAU*min    | Height mAU      | Relative Area % | Relative Height % | Amount n.a. |
| 1                   |           | 18.567             | 1281.129        | 3226.361        | 49.48           | 50.85             | n.a.        |
| 2                   |           | 19.873             | 1307.928        | 3118.904        | 50.52           | 49.15             | n.a.        |
| <b>Total:</b>       |           |                    | <b>2589.057</b> | <b>6345.265</b> | <b>100.00</b>   | <b>100.00</b>     |             |

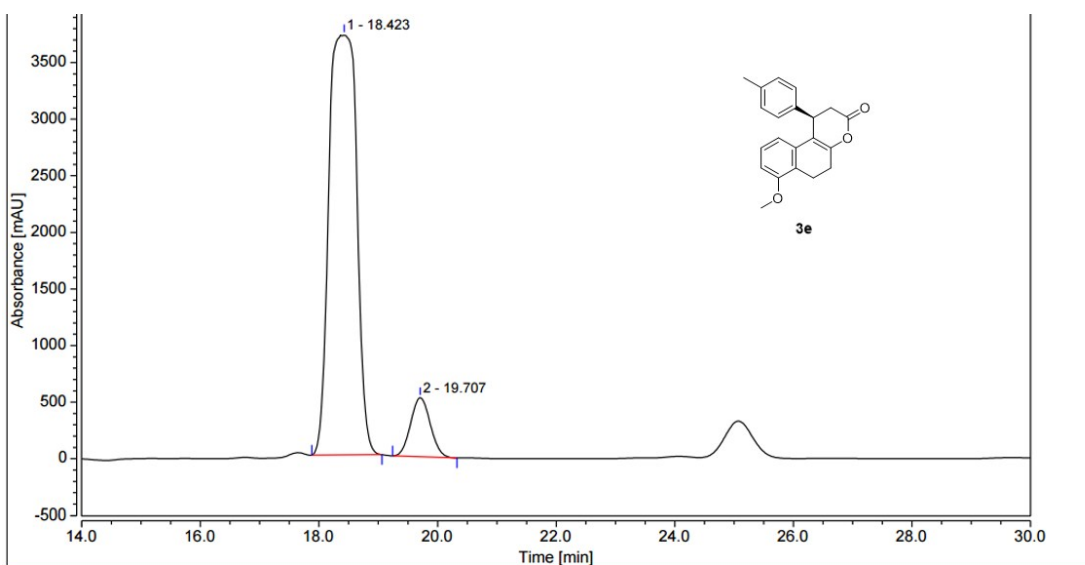

| Integration Results |           |                    |                 |                 |                 |                   |             |
|---------------------|-----------|--------------------|-----------------|-----------------|-----------------|-------------------|-------------|
| No.                 | Peak Name | Retention Time min | Area mAU*min    | Height mAU      | Relative Area % | Relative Height % | Amount n.a. |
| 1                   |           | 18.423             | 2010.596        | 3712.980        | 90.93           | 87.66             | n.a.        |
| 2                   |           | 19.707             | 200.583         | 522.561         | 9.07            | 12.34             | n.a.        |
| <b>Total:</b>       |           |                    | <b>2211.179</b> | <b>4235.542</b> | <b>100.00</b>   | <b>100.00</b>     |             |

HPLC analysis: 82% ee, [Daicel Chiralpak IC, n-hexane/2-propanol = 90/10,  $v = 0.8$  mL/min,  $\lambda = 254$  nm,  $t$  (major) = 18.4 min,  $t$  (minor) = 19.7 min].

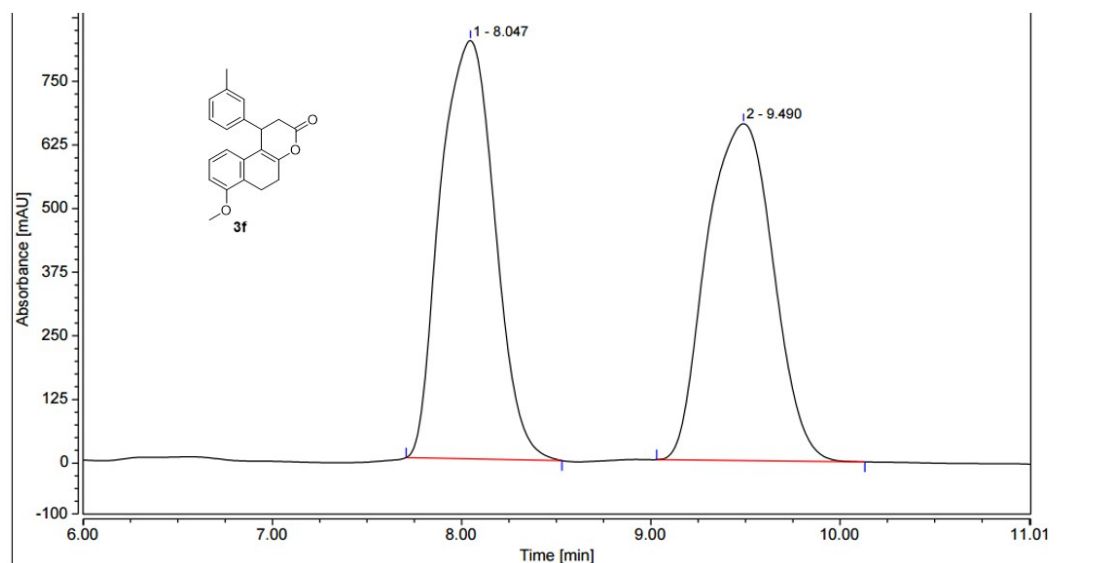

| Integration Results |           |                    |                |                 |                 |                   |        |
|---------------------|-----------|--------------------|----------------|-----------------|-----------------|-------------------|--------|
| No.                 | Peak Name | Retention Time min | Area mAU*min   | Height mAU      | Relative Area % | Relative Height % | Amount |
| 1                   |           | 8.047              | 274.601        | 821.964         | 50.31           | 55.38             | n.a.   |
| 2                   |           | 9.490              | 271.188        | 662.317         | 49.69           | 44.62             | n.a.   |
| <b>Total:</b>       |           |                    | <b>545.788</b> | <b>1484.280</b> | <b>100.00</b>   | <b>100.00</b>     |        |

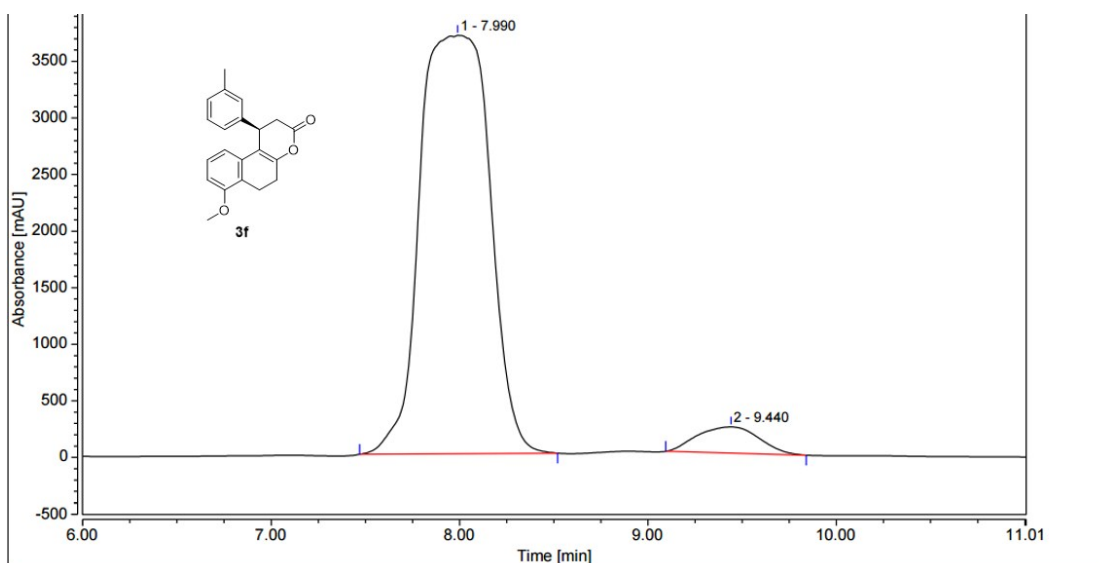

| Integration Results |           |                    |                 |                 |                 |                   |        |
|---------------------|-----------|--------------------|-----------------|-----------------|-----------------|-------------------|--------|
| No.                 | Peak Name | Retention Time min | Area mAU*min    | Height mAU      | Relative Area % | Relative Height % | Amount |
| 1                   |           | 7.990              | 1589.607        | 3699.594        | 94.75           | 94.10             | n.a.   |
| 2                   |           | 9.440              | 87.991          | 231.789         | 5.25            | 5.90              | n.a.   |
| <b>Total:</b>       |           |                    | <b>1677.597</b> | <b>3931.383</b> | <b>100.00</b>   | <b>100.00</b>     |        |

HPLC analysis: 90% ee, [Daicel Chiralpak AD-H, n-hexane/2-propanol = 90/10,  $v = 0.8$  mL/min,  $\lambda = 254$  nm,  $t$  (major) = 7.9 min,  $t$  (minor) = 9.4 min].

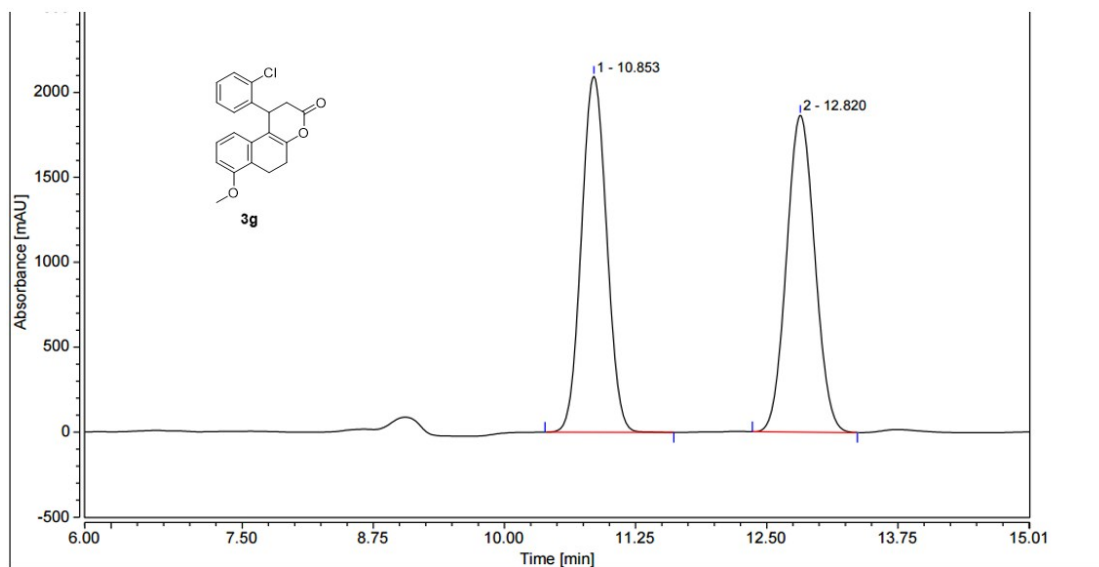

| Integration Results |           |                    |                 |                 |                 |                   |        |
|---------------------|-----------|--------------------|-----------------|-----------------|-----------------|-------------------|--------|
| No.                 | Peak Name | Retention Time min | Area mAU*min    | Height mAU      | Relative Area % | Relative Height % | Amount |
| 1                   |           | 10.853             | 583.189         | 2095.448        | 49.93           | 52.90             | n.a.   |
| 2                   |           | 12.820             | 584.751         | 1866.031        | 50.07           | 47.10             | n.a.   |
| <b>Total:</b>       |           |                    | <b>1167.940</b> | <b>3961.479</b> | <b>100.00</b>   | <b>100.00</b>     |        |

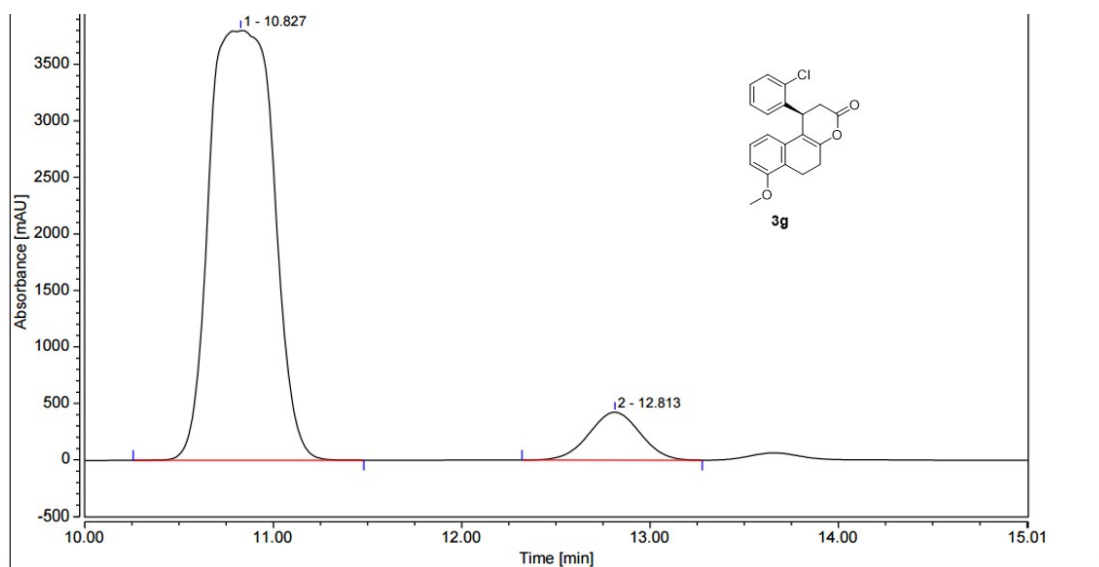

| Integration Results |           |                    |                 |                 |                 |                   |        |
|---------------------|-----------|--------------------|-----------------|-----------------|-----------------|-------------------|--------|
| No.                 | Peak Name | Retention Time min | Area mAU*min    | Height mAU      | Relative Area % | Relative Height % | Amount |
| 1                   |           | 10.827             | 1501.803        | 3802.561        | 91.80           | 89.97             | n.a.   |
| 2                   |           | 12.813             | 134.150         | 423.965         | 8.20            | 10.03             | n.a.   |
| <b>Total:</b>       |           |                    | <b>1635.953</b> | <b>4226.526</b> | <b>100.00</b>   | <b>100.00</b>     |        |

HPLC analysis: 84% ee, [Daicel Chiralpak OZ-H, n-hexane/2-propanol = 90/10,  $v = 0.8$  mL/min,  $\lambda = 254$  nm,  $t$  (major) = 10.8 min,  $t$  (minor) = 12.8 min].

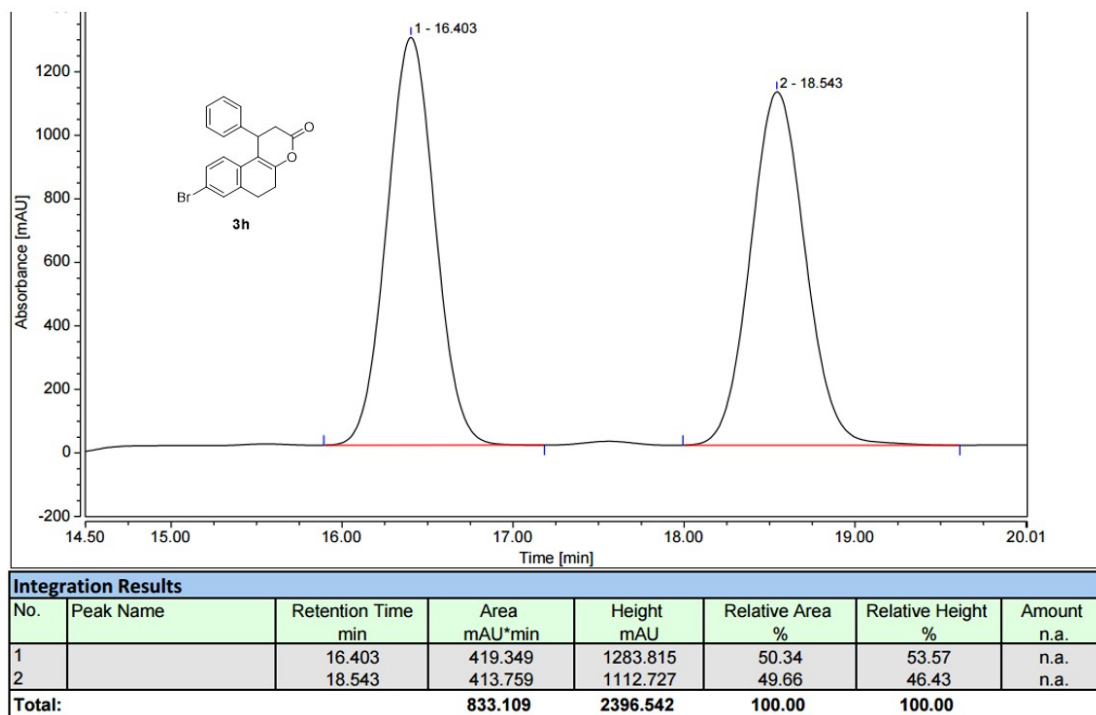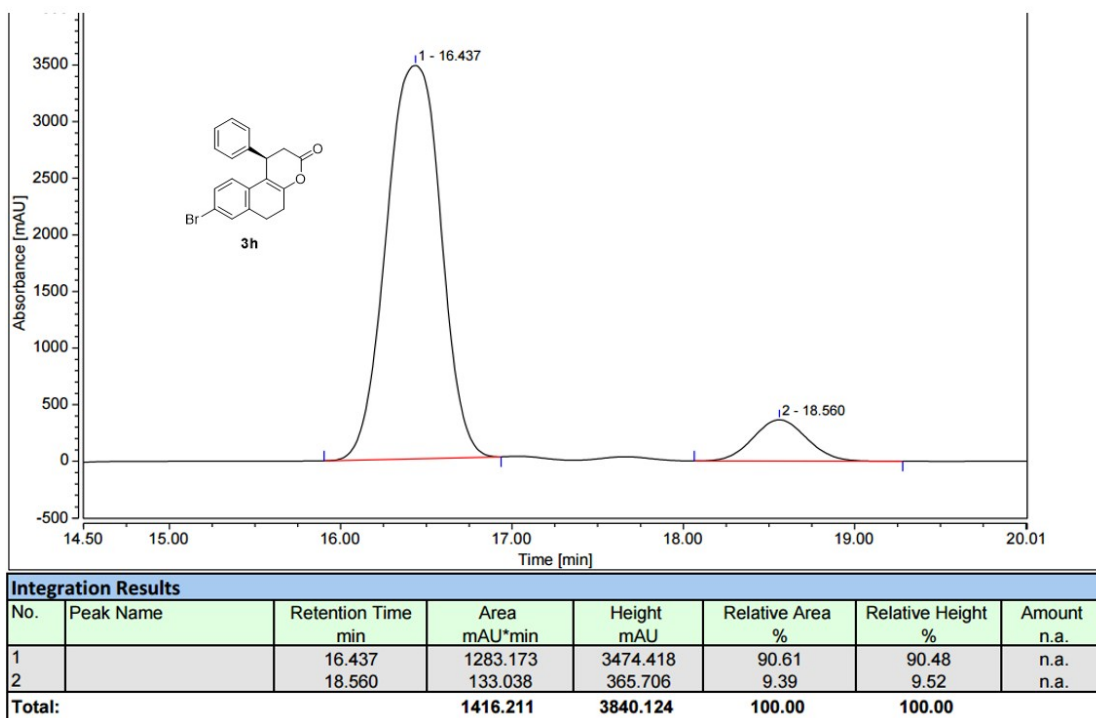

HPLC analysis: 81% ee, [Daicel Chiralpak IC, n-hexane/2-propanol = 90/0,  $v = 0.8$  mL/min,  $\lambda = 254$  nm,  $t$  (major) = 16.4 min,  $t$  (minor) = 18.5 min].

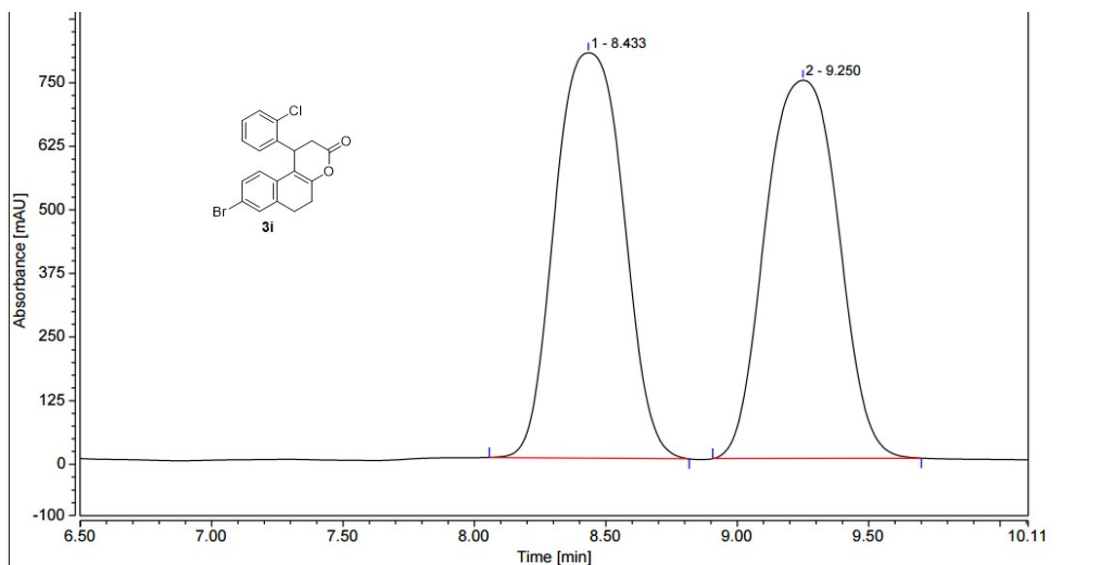

| Integration Results |           |                    |                |                 |                 |                   |        |
|---------------------|-----------|--------------------|----------------|-----------------|-----------------|-------------------|--------|
| No.                 | Peak Name | Retention Time min | Area mAU*min   | Height mAU      | Relative Area % | Relative Height % | Amount |
| 1                   |           | 8.433              | 240.481        | 796.890         | 50.07           | 51.74             | n.a.   |
| 2                   |           | 9.250              | 239.834        | 743.435         | 49.93           | 48.26             | n.a.   |
| <b>Total:</b>       |           |                    | <b>480.314</b> | <b>1540.326</b> | <b>100.00</b>   | <b>100.00</b>     |        |

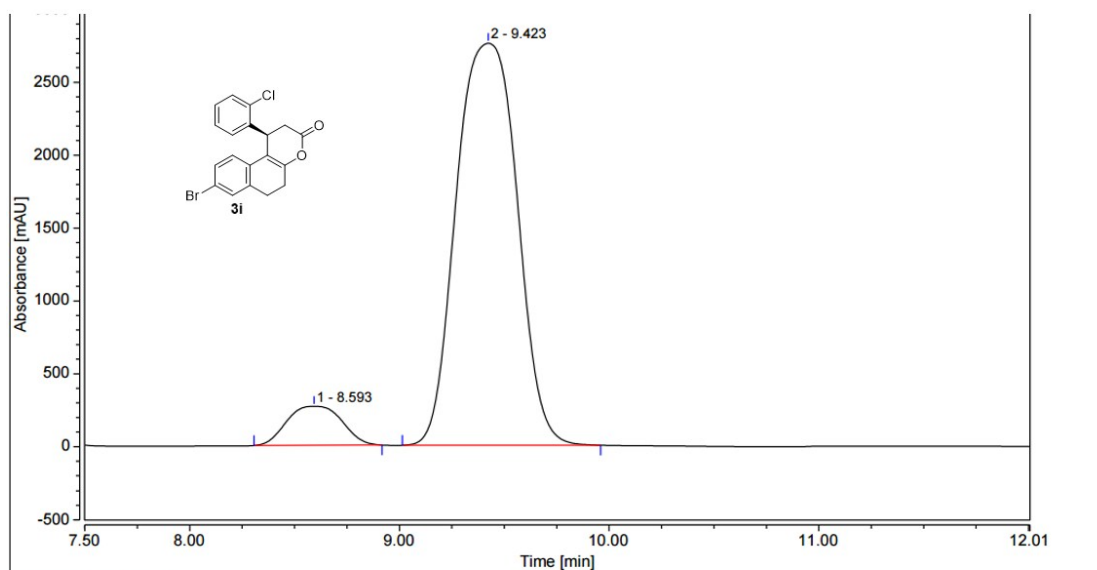

| Integration Results |           |                    |                 |                 |                 |                   |        |
|---------------------|-----------|--------------------|-----------------|-----------------|-----------------|-------------------|--------|
| No.                 | Peak Name | Retention Time min | Area mAU*min    | Height mAU      | Relative Area % | Relative Height % | Amount |
| 1                   |           | 8.593              | 81.279          | 267.953         | 8.03            | 8.85              | n.a.   |
| 2                   |           | 9.423              | 930.589         | 2759.336        | 91.97           | 91.15             | n.a.   |
| <b>Total:</b>       |           |                    | <b>1011.868</b> | <b>3027.289</b> | <b>100.00</b>   | <b>100.00</b>     |        |

HPLC analysis: 84% ee, [Daicel Chiralpak IA, n-hexane/2-propanol = 90/10,  $v = 0.8$  mL/min,  $\lambda = 254$  nm,  $t$  (major) = 9.4 min,  $t$  (minor) = 8.5 min].

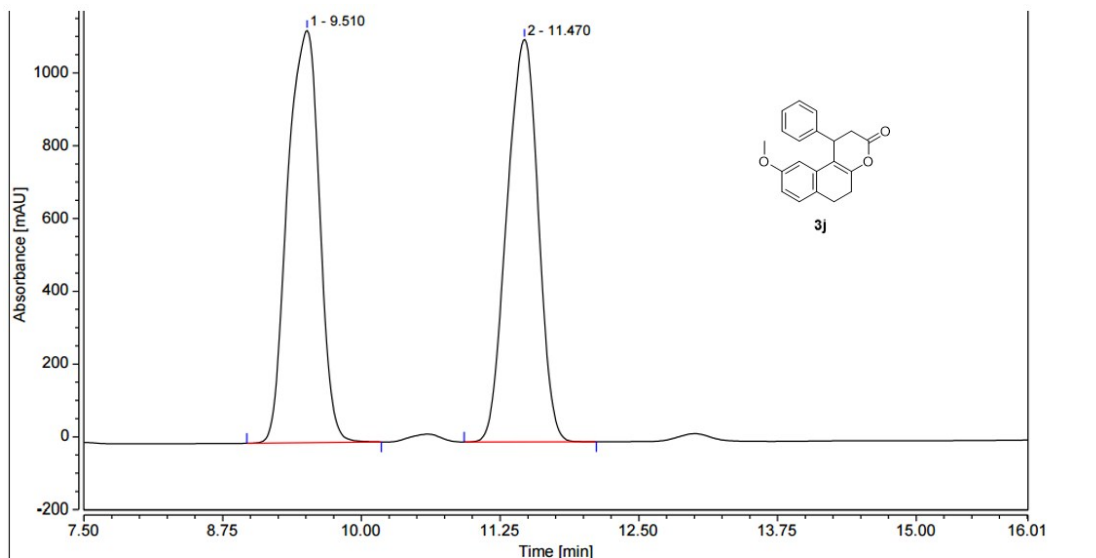

| Integration Results |           |                    |                |                 |                 |                   |        |
|---------------------|-----------|--------------------|----------------|-----------------|-----------------|-------------------|--------|
| No.                 | Peak Name | Retention Time min | Area mAU*min   | Height mAU      | Relative Area % | Relative Height % | Amount |
| 1                   |           | 9.510              | 376.811        | 1133.256        | 51.05           | 50.60             | n.a.   |
| 2                   |           | 11.470             | 361.324        | 1106.299        | 48.95           | 49.40             | n.a.   |
| <b>Total:</b>       |           |                    | <b>738.135</b> | <b>2239.556</b> | <b>100.00</b>   | <b>100.00</b>     |        |

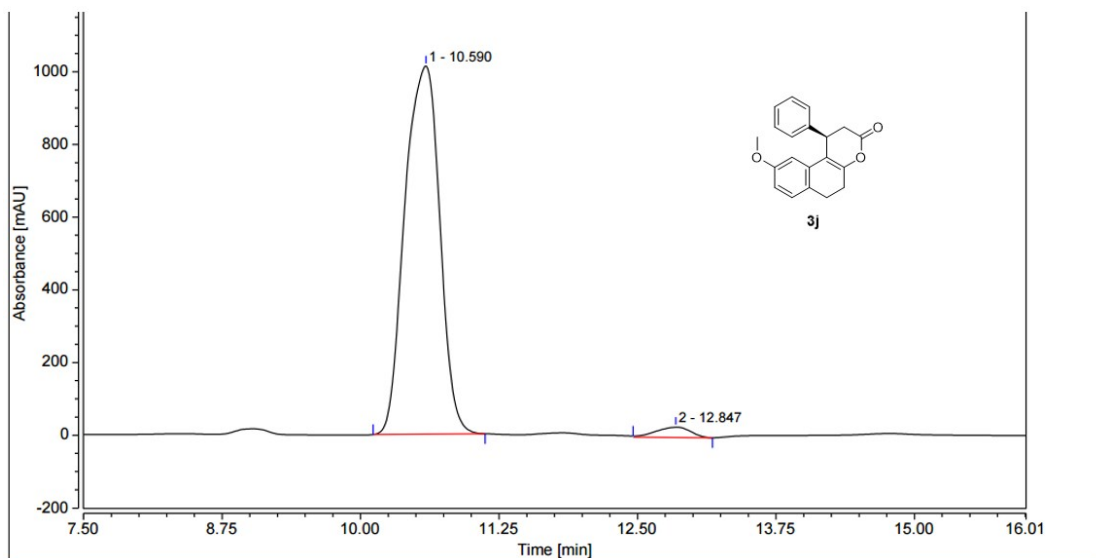

| Integration Results |           |                    |                |                 |                 |                   |        |
|---------------------|-----------|--------------------|----------------|-----------------|-----------------|-------------------|--------|
| No.                 | Peak Name | Retention Time min | Area mAU*min   | Height mAU      | Relative Area % | Relative Height % | Amount |
| 1                   |           | 10.590             | 369.370        | 1013.354        | 97.31           | 97.27             | n.a.   |
| 2                   |           | 12.847             | 10.226         | 28.398          | 2.69            | 2.73              | n.a.   |
| <b>Total:</b>       |           |                    | <b>379.596</b> | <b>1041.752</b> | <b>100.00</b>   | <b>100.00</b>     |        |

HPLC analysis: 95% ee, [Daicel Chiralpak IA, n-hexane/2-propanol = 90/10,  $v = 0.8$  mL/min,  $\lambda = 254$  nm,  $t$  (major) = 10.5 min,  $t$  (minor) = 12.8 min].

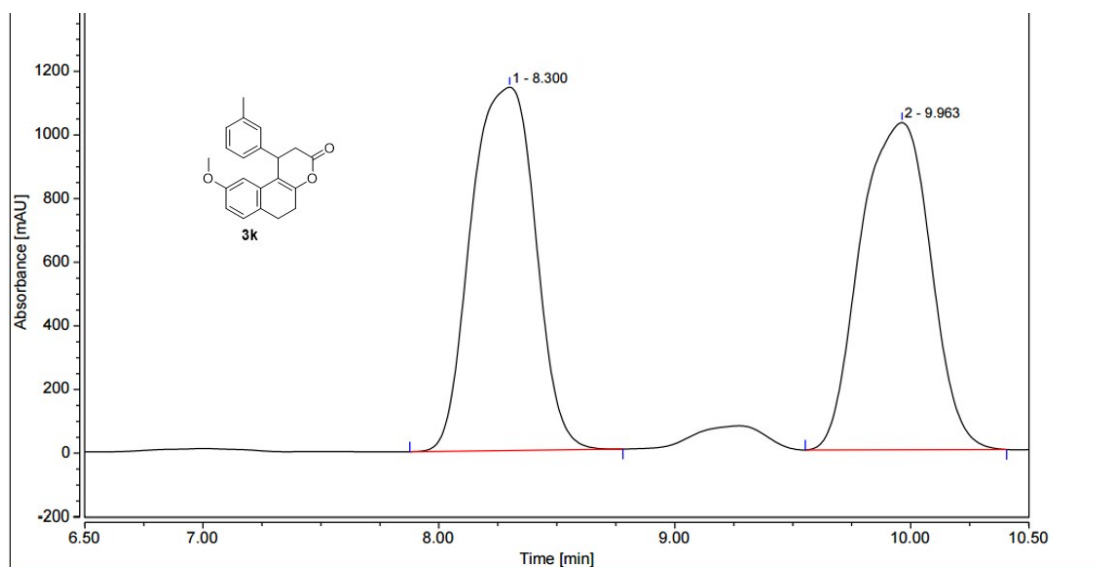

| Integration Results |           |                       |                 |                 |                    |                      |        |
|---------------------|-----------|-----------------------|-----------------|-----------------|--------------------|----------------------|--------|
| No.                 | Peak Name | Retention Time<br>min | Area<br>mAU*min | Height<br>mAU   | Relative Area<br>% | Relative Height<br>% | Amount |
| 1                   |           | 8.300                 | 360.480         | 1141.424        | 50.37              | 52.61                | n.a.   |
| 2                   |           | 9.963                 | 355.169         | 1028.024        | 49.63              | 47.39                | n.a.   |
| <b>Total:</b>       |           |                       | <b>715.649</b>  | <b>2169.448</b> | <b>100.00</b>      | <b>100.00</b>        |        |

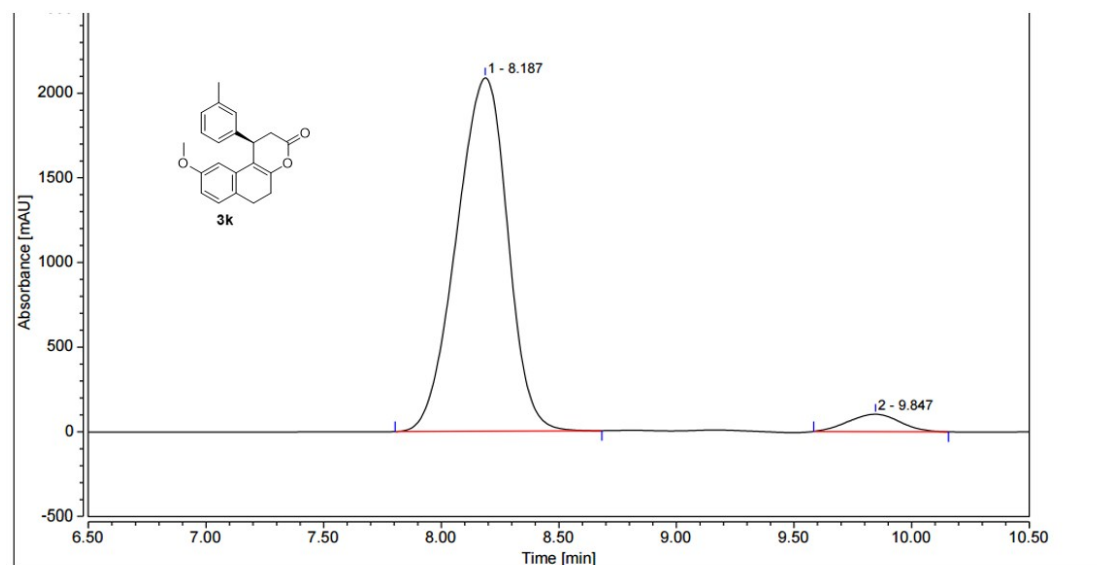

| Integration Results |           |                       |                 |                 |                    |                      |        |
|---------------------|-----------|-----------------------|-----------------|-----------------|--------------------|----------------------|--------|
| No.                 | Peak Name | Retention Time<br>min | Area<br>mAU*min | Height<br>mAU   | Relative Area<br>% | Relative Height<br>% | Amount |
| 1                   |           | 8.187                 | 526.025         | 2087.254        | 95.27              | 95.29                | n.a.   |
| 2                   |           | 9.847                 | 26.136          | 103.253         | 4.73               | 4.71                 | n.a.   |
| <b>Total:</b>       |           |                       | <b>552.162</b>  | <b>2190.507</b> | <b>100.00</b>      | <b>100.00</b>        |        |

HPLC analysis: 91% ee, [Daicel Chiralpak IA, n-hexane/2-propanol = 90/10,  $v = 0.8$  mL/min,  $\lambda = 254$  nm,  $t$  (major) = 8.1 min,  $t$  (minor) = 9.8 min].



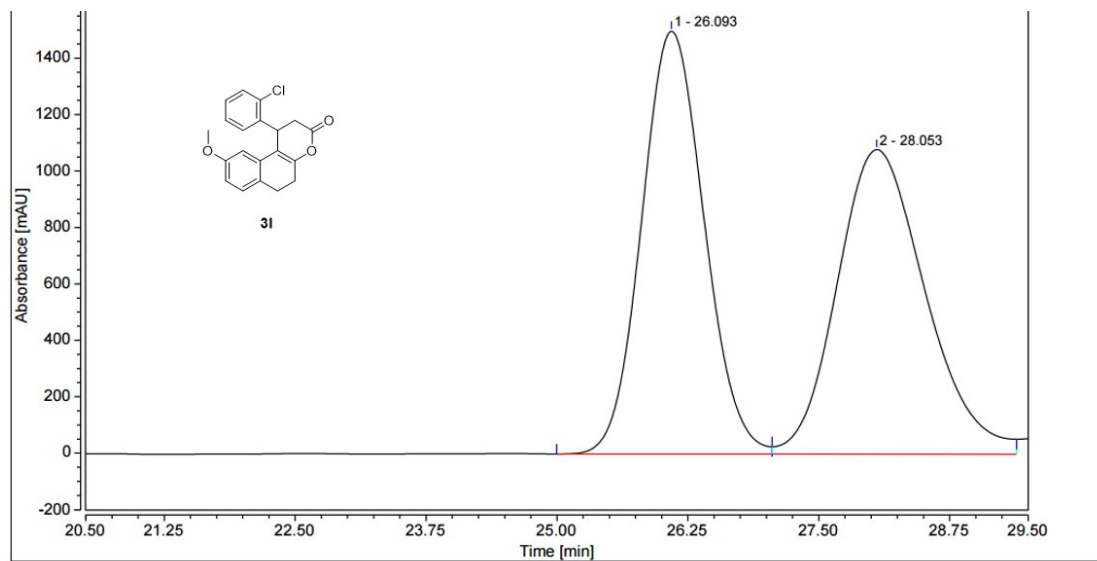

| Integration Results |           |                       |                 |                 |                    |                      |                |
|---------------------|-----------|-----------------------|-----------------|-----------------|--------------------|----------------------|----------------|
| No.                 | Peak Name | Retention Time<br>min | Area<br>mAU*min | Height<br>mAU   | Relative Area<br>% | Relative Height<br>% | Amount<br>n.a. |
| 1                   |           | 26.093                | 1038.040        | 1498.947        | 49.66              | 58.13                | n.a.           |
| 2                   |           | 28.053                | 1052.291        | 1079.832        | 50.34              | 41.87                | n.a.           |
| <b>Total:</b>       |           |                       | <b>2090.330</b> | <b>2578.779</b> | <b>100.00</b>      | <b>100.00</b>        |                |

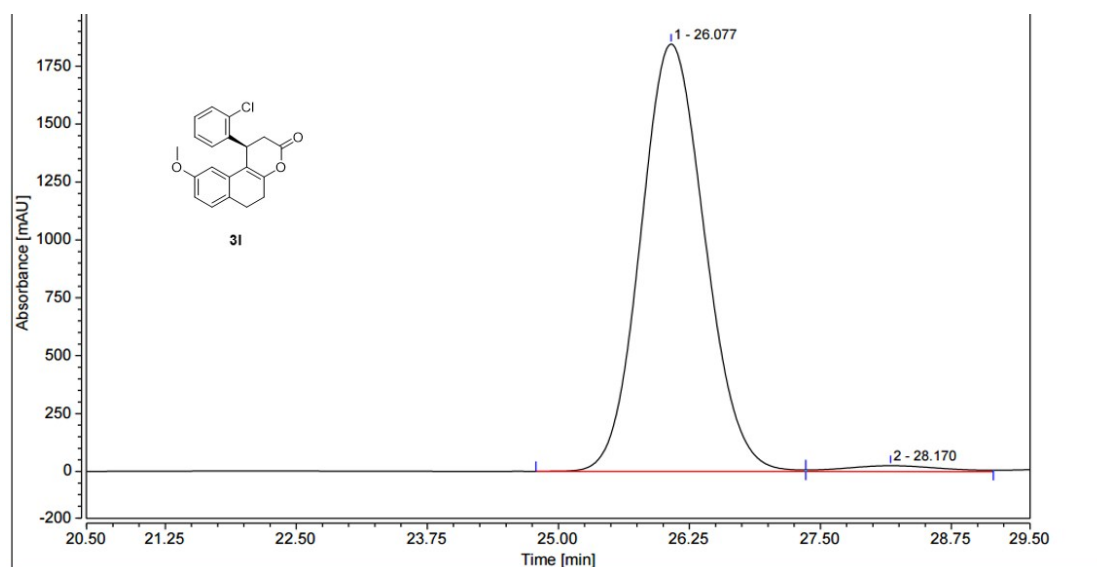

| Integration Results |           |                       |                 |                 |                    |                      |                |
|---------------------|-----------|-----------------------|-----------------|-----------------|--------------------|----------------------|----------------|
| No.                 | Peak Name | Retention Time<br>min | Area<br>mAU*min | Height<br>mAU   | Relative Area<br>% | Relative Height<br>% | Amount<br>n.a. |
| 1                   |           | 26.077                | 1308.654        | 1845.928        | 97.91              | 98.62                | n.a.           |
| 2                   |           | 28.170                | 27.887          | 25.895          | 2.09               | 1.38                 | n.a.           |
| <b>Total:</b>       |           |                       | <b>1336.541</b> | <b>1871.823</b> | <b>100.00</b>      | <b>100.00</b>        |                |

HPLC analysis: 96% ee, [Daicel Chiralpak IC, n-hexane/2-propanol = 95/5,  $v = 0.6$  mL/min,  $\lambda = 254$  nm,  $t$  (major) = 26.0 min,  $t$  (minor) = 28.1 min].



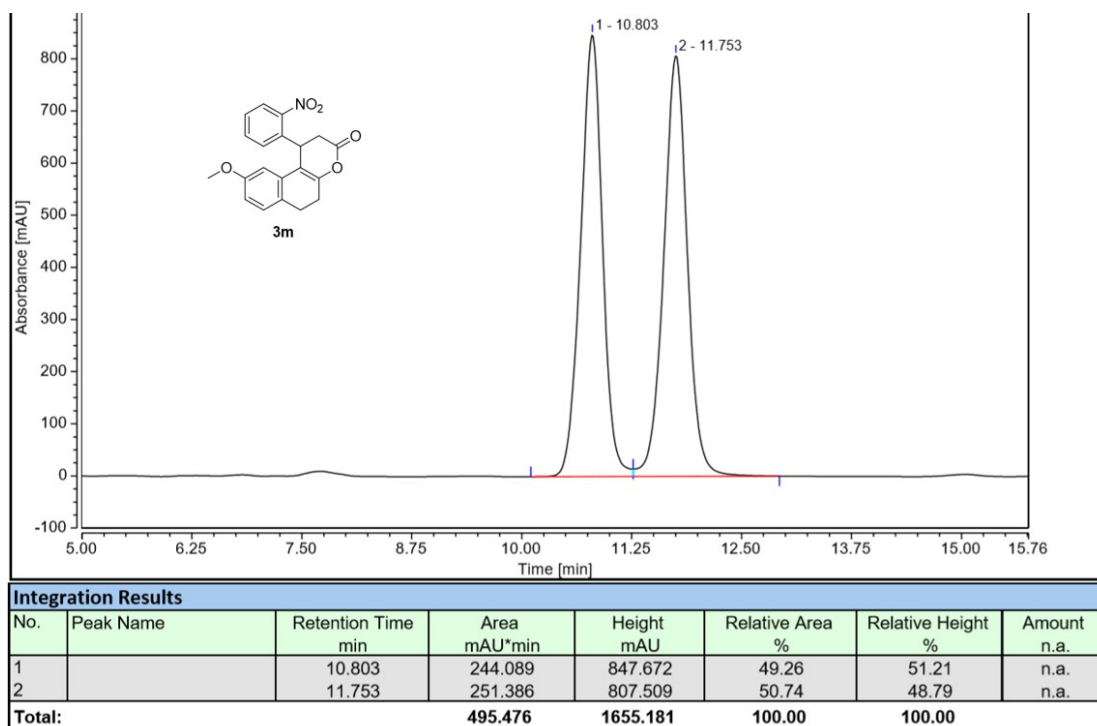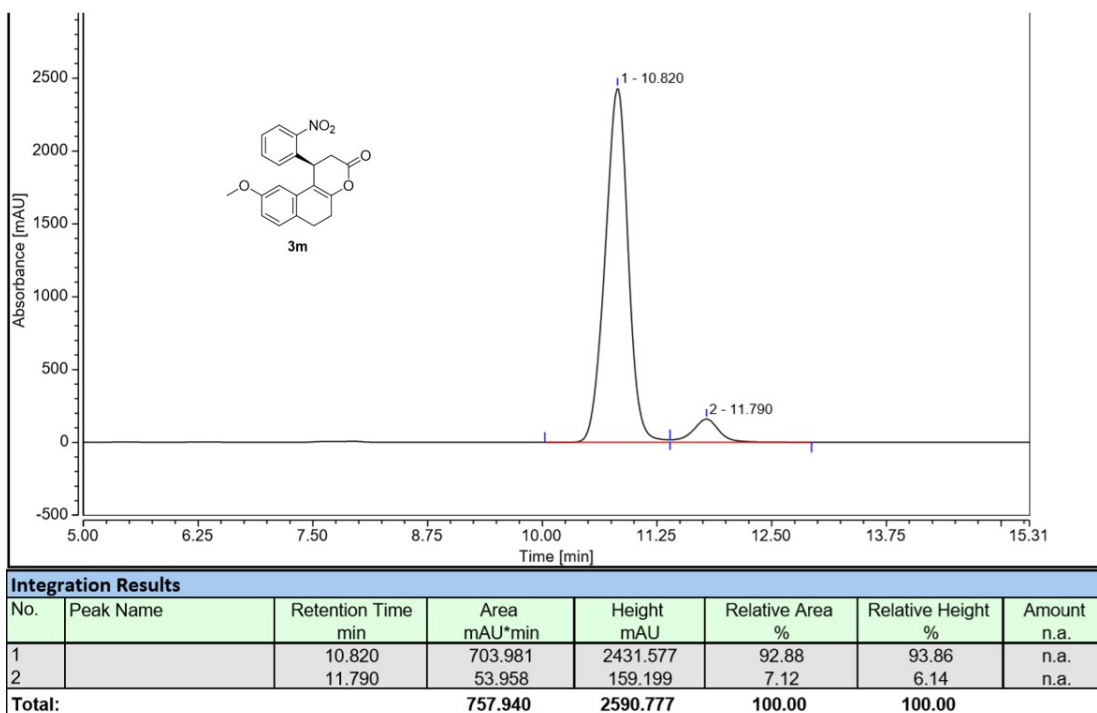

HPLC analysis: 86% ee, [Daicel Chiralpak IA, n-hexane/2-propanol = 90/10,  $v = 0.8$  mL/min,  $\lambda = 254$  nm,  $t$  (major) = 10.8 min,  $t$  (minor) = 11.7 min].

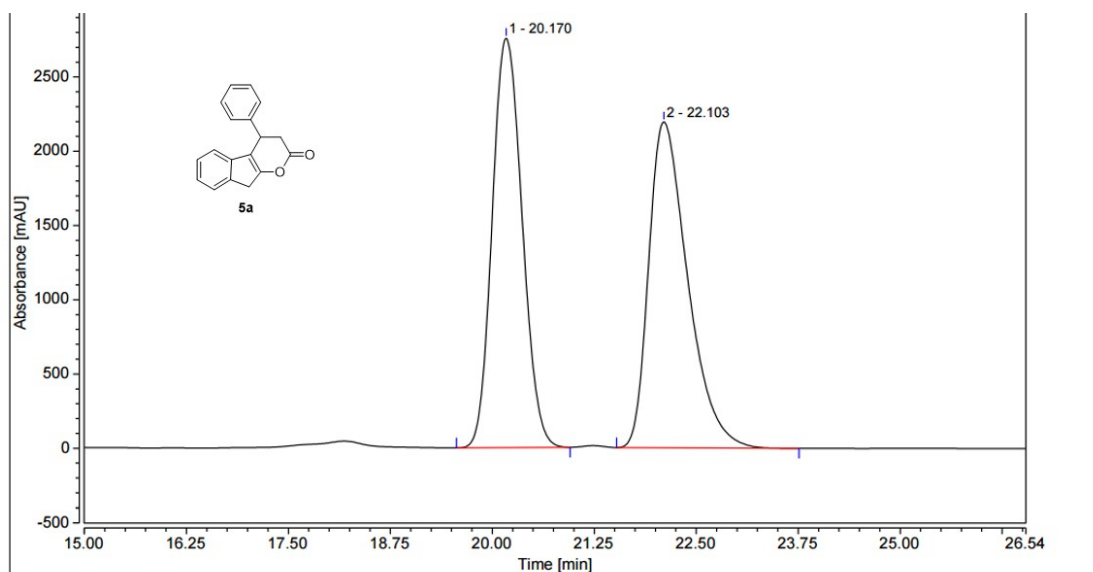

| Integration Results |           |                    |                 |                 |                 |                   |        |
|---------------------|-----------|--------------------|-----------------|-----------------|-----------------|-------------------|--------|
| No.                 | Peak Name | Retention Time min | Area mAU*min    | Height mAU      | Relative Area % | Relative Height % | Amount |
| 1                   |           | 20.170             | 1173.611        | 2757.602        | 49.15           | 55.68             | n.a.   |
| 2                   |           | 22.103             | 1214.353        | 2195.305        | 50.85           | 44.32             | n.a.   |
| <b>Total:</b>       |           |                    | <b>2387.964</b> | <b>4952.907</b> | <b>100.00</b>   | <b>100.00</b>     |        |

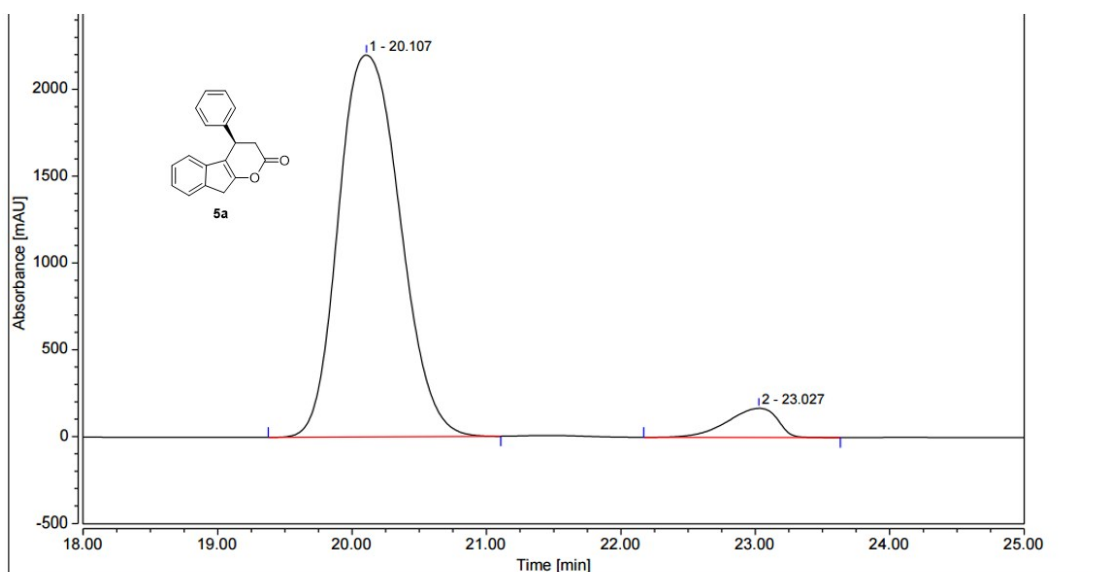

| Integration Results |           |                    |                 |                 |                 |                   |        |
|---------------------|-----------|--------------------|-----------------|-----------------|-----------------|-------------------|--------|
| No.                 | Peak Name | Retention Time min | Area mAU*min    | Height mAU      | Relative Area % | Relative Height % | Amount |
| 1                   |           | 20.107             | 1170.767        | 2200.045        | 94.17           | 92.92             | n.a.   |
| 2                   |           | 23.027             | 72.433          | 167.671         | 5.83            | 7.08              | n.a.   |
| <b>Total:</b>       |           |                    | <b>1243.200</b> | <b>2367.716</b> | <b>100.00</b>   | <b>100.00</b>     |        |

HPLC analysis: 88% ee, [Daicel Chiralpak IC, n-hexane/2-propanol = 95/5,  $v = 0.7$  mL/min,  $\lambda = 254$  nm,  $t$  (major) = 20.5 min,  $t$  (minor) = 23.3 min].

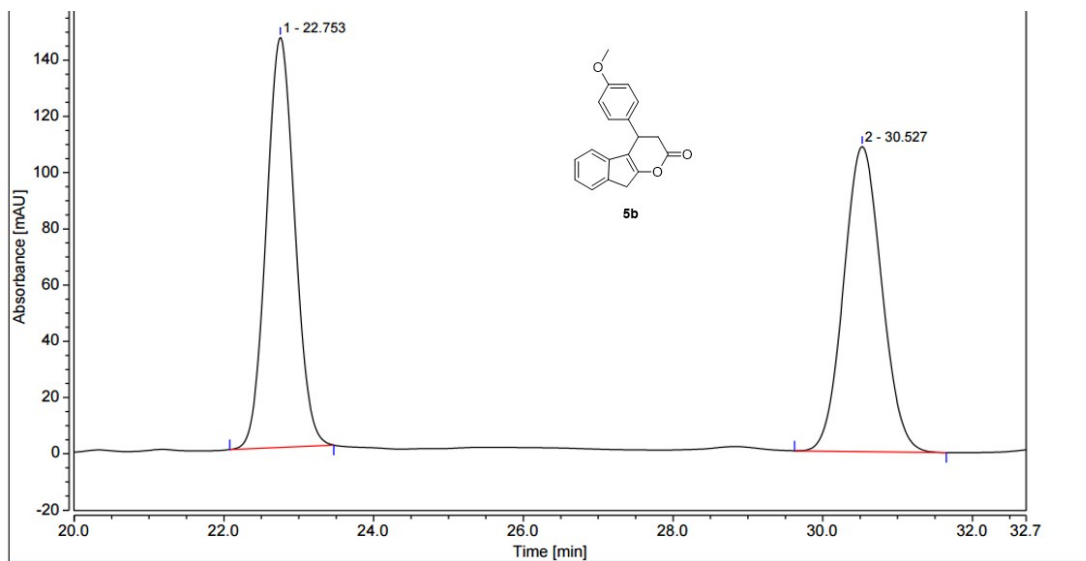

| Integration Results |           |                       |                 |                |                    |                      |                |
|---------------------|-----------|-----------------------|-----------------|----------------|--------------------|----------------------|----------------|
| No.                 | Peak Name | Retention Time<br>min | Area<br>mAU*min | Height<br>mAU  | Relative Area<br>% | Relative Height<br>% | Amount<br>n.a. |
| 1                   |           | 22.753                | 64.143          | 145.884        | 50.12              | 57.33                | n.a.           |
| 2                   |           | 30.527                | 63.838          | 108.574        | 49.88              | 42.67                | n.a.           |
| <b>Total:</b>       |           |                       | <b>127.981</b>  | <b>254.458</b> | <b>100.00</b>      | <b>100.00</b>        |                |

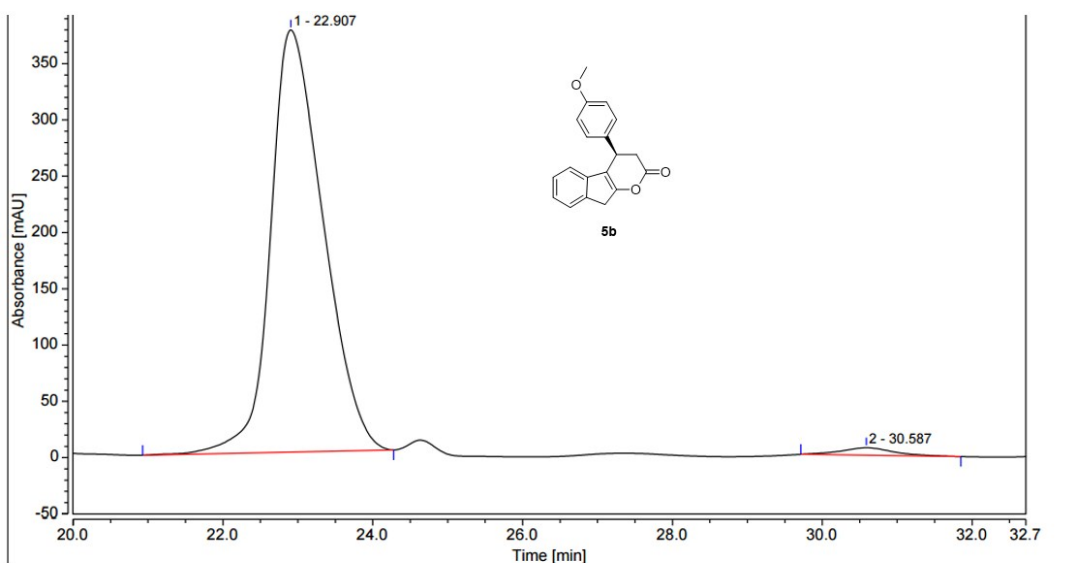

| Integration Results |           |                       |                 |                |                    |                      |                |
|---------------------|-----------|-----------------------|-----------------|----------------|--------------------|----------------------|----------------|
| No.                 | Peak Name | Retention Time<br>min | Area<br>mAU*min | Height<br>mAU  | Relative Area<br>% | Relative Height<br>% | Amount<br>n.a. |
| 1                   |           | 22.907                | 305.537         | 375.179        | 98.25              | 98.25                | n.a.           |
| 2                   |           | 30.587                | 5.446           | 6.671          | 1.75               | 1.75                 | n.a.           |
| <b>Total:</b>       |           |                       | <b>310.983</b>  | <b>381.850</b> | <b>100.00</b>      | <b>100.00</b>        |                |

HPLC analysis: 97% ee, [Daicel Chiralpak IC, n-hexane/2-propanol = 90/10,  $v = 0.8$  mL/min,  $\lambda = 254$  nm,  $t$  (major) = 22.9 min,  $t$  (minor) = 30.5 min].

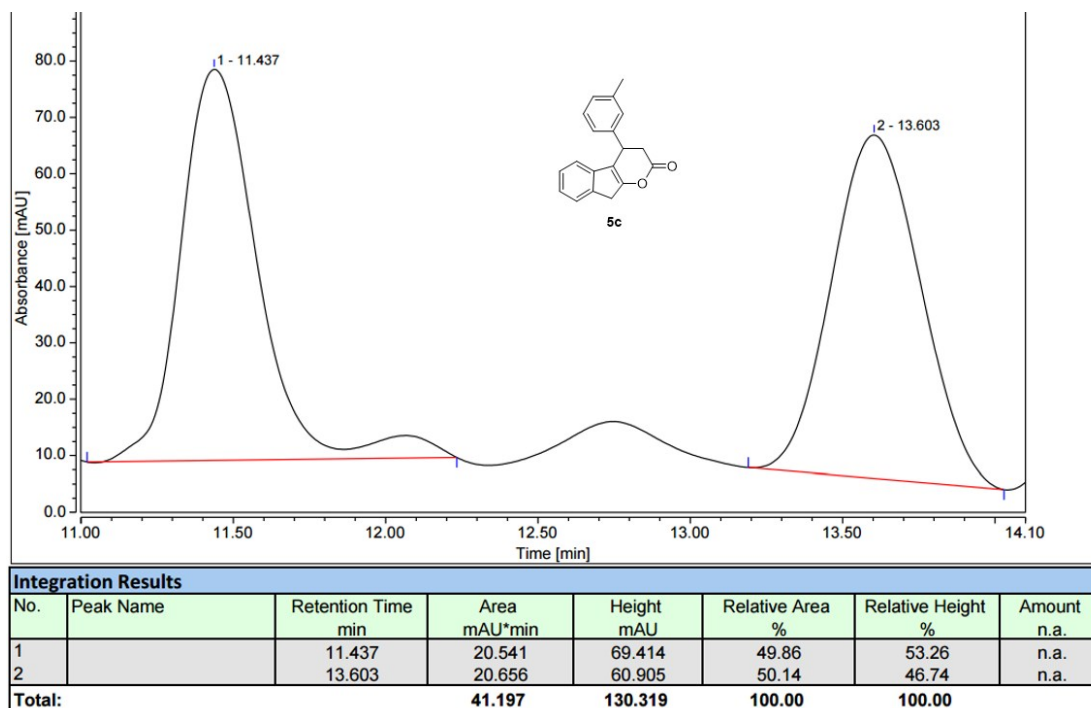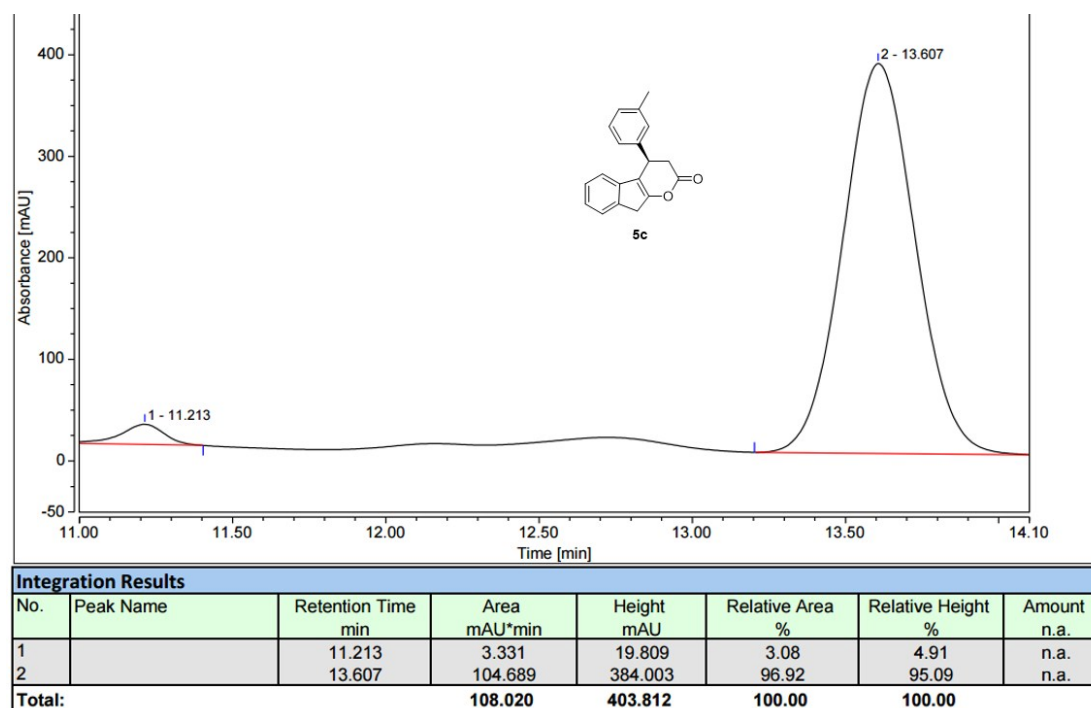

HPLC analysis: 94% ee, [Daicel Chiralpak IC, n-hexane/2-propanol = 90/10,  $v = 0.8$  mL/min,  $\lambda = 254$  nm,  $t$  (major) = 13.6 min,  $t$  (minor) = 11.2 min].

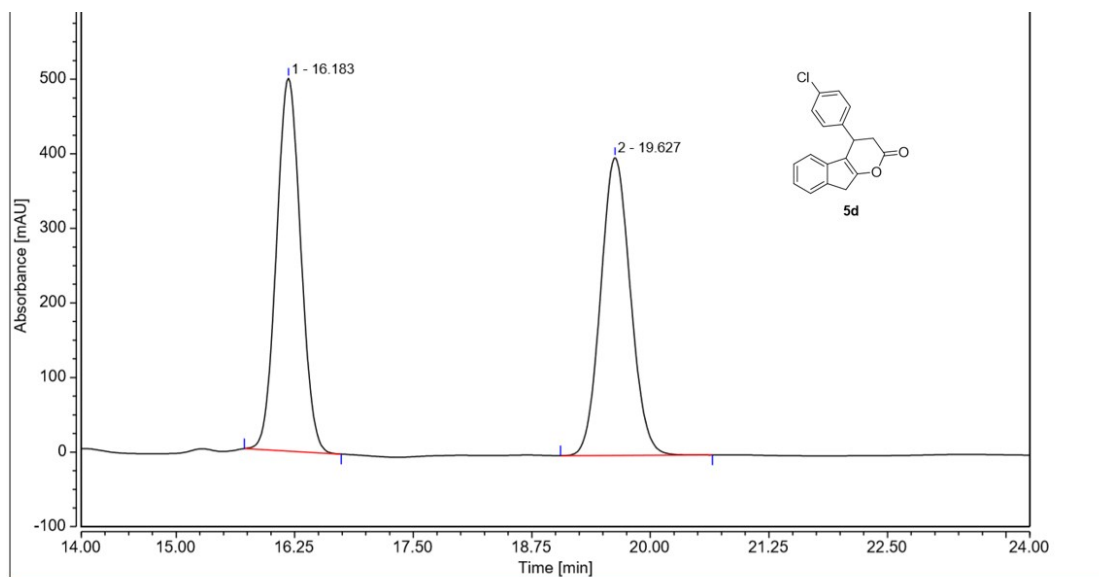

| Integration Results |           |                    |                |                |                 |                   |             |
|---------------------|-----------|--------------------|----------------|----------------|-----------------|-------------------|-------------|
| No.                 | Peak Name | Retention Time min | Area mAU*min   | Height mAU     | Relative Area % | Relative Height % | Amount n.a. |
| 1                   |           | 16.183             | 148.269        | 500.310        | 50.52           | 55.59             | n.a.        |
| 2                   |           | 19.627             | 145.228        | 399.673        | 49.48           | 44.41             | n.a.        |
| <b>Total:</b>       |           |                    | <b>293.497</b> | <b>899.983</b> | <b>100.00</b>   | <b>100.00</b>     |             |

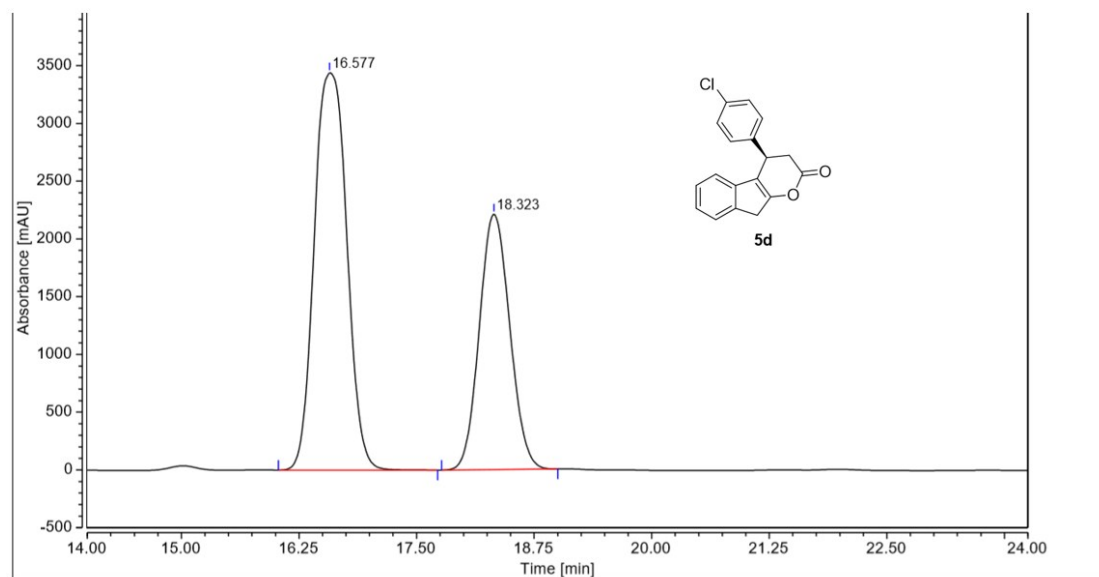

| Integration Results |           |                    |                 |                 |                 |                   |             |
|---------------------|-----------|--------------------|-----------------|-----------------|-----------------|-------------------|-------------|
| No.                 | Peak Name | Retention Time min | Area mAU*min    | Height mAU      | Relative Area % | Relative Height % | Amount n.a. |
| 1                   |           | 16.577             | 1379.490        | 3441.388        | 62.46           | 60.87             | n.a.        |
| 2                   |           | 18.323             | 829.200         | 2212.570        | 37.54           | 39.13             | n.a.        |
| <b>Total:</b>       |           |                    | <b>2208.690</b> | <b>5653.958</b> | <b>100.00</b>   | <b>100.00</b>     |             |

HPLC analysis: 25% ee, [Daicel Chiralpak IC, n-hexane/2-propanol = 90/10, v = 0.8 mL/min,  $\lambda$  = 254 nm, t (major) = 16.5 min, t (minor) = 18.3 min].
